# Supplementary material for: Rational synthesis of bis(hexyloxy)-tetra(hydroxy)-triphenylenes and their derivatives
Source: Royal Society of Chemistry journal article supplement (doi:10.1039/c4ra06503d), 2014-01-01
Supplement: c4ra06503d1.pdf [file c4ra06503d1.pdf]

# RSC Advances

## Rational Synthesis of Bis(hexyloxy)- Tetra(hydroxy)-Triphenylenes and their Derivatives.

Merry K. Smith, Natalia Powers-Riggs, and Brian H. Northrop\*

Wesleyan University, Department of Chemistry

Hall-Atwater Laboratories, 52 Lawn Ave., Middletown, CT 06459, USA

Email: [bnorthrop@wesleyan.edu](mailto:bnorthrop@wesleyan.edu), phone: 860-685-3987

### SUPPORTING INFORMATION

(45 pages)

|             |                                                     |                |
|-------------|-----------------------------------------------------|----------------|
| <b>I.</b>   | <b>General Synthetic Procedures</b>                 | <b>S2</b>      |
| <b>II.</b>  | <b>Synthesis of Compounds</b>                       | <b>S3-S5</b>   |
| <b>III.</b> | <b><sup>1</sup>H and <sup>13</sup>C NMR Spectra</b> | <b>S6-S24</b>  |
| <b>IV.</b>  | <b>Mass Spectrometric Data</b>                      | <b>S25-S42</b> |
| <b>V.</b>   | <b>UV-Vis Spectroscopy</b>                          | <b>S43</b>     |
| <b>VI.</b>  | <b>Differential Scanning Calorimetry</b>            | <b>S44</b>     |
| <b>VII.</b> | <b>Supporting References</b>                        | <b>S45</b>     |

## I. General Synthetic Procedures

*General Methods:* Chemicals were purchased from Aldrich, Strem, Acros, TCI America, or Cambridge Isotope Labs and used as received. Solvents were dried using an Innovative Technologies SPS-400-5 solvent purification system. Thin layer chromatography (TLC) was performed on alumina-backed sheets coated with silica gel 60 F254. TLC plates were visualized using a UV/Vis lamp and/or by staining with iodine or *p*-anisaldehyde solution. Column chromatography was performed using glass columns over Dynamic Absorbents 60 Å, 32-63 μm silica gel. Melting points were determined on a Mettler Toledo Mel-Temp II melting point apparatus and are uncorrected. UV/Vis spectroscopy was recorded on a Varian Cary 100 Bio UV-Visible spectrophotometer. All <sup>1</sup>H and <sup>13</sup>C NMR spectra were recorded with a Varian Mercury (300 MHz and 75 MHz, respectively) or Varian Unity Plus (400 MHz and 100 MHz, respectively) spectrometer using residual solvent as the internal standard. All chemical shifts are quoted using the δ scale and all coupling constants are expressed in Hertz (Hz). Accurate mass EI/GCMS and ESI/APCI mass spectrometric analysis of compounds **1-6**, **9-10**, **13-14**, **16-18**, **20-23**, and **26** were performed at the UC Riverside Mass Spec Facility. Differential scanning calorimetry was recorded with a TA DSC Q20 equipped with a TA refrigerated cooling system 90. Compounds **7**, **8**, **11**, **12**, **15**, **19**, and **24** were prepared according to literature procedures<sup>1-7</sup>.

## II. Synthesis of Compounds

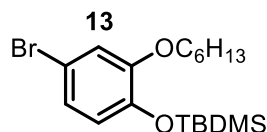

**Compound 13:** Under an inert atmosphere, **Compound 12** (1.5g, 5.49 mmol) was dissolved in dimethylformamide (5.5 mL) and diisopropylethylamine (1.5 mL, 8.79 mmol) was added dropwise. The solution was stirred for 15 minutes, tertbutyldimethylsilylchloride (1.2 g, 8.24 mmol) was added, and the solution stirred overnight. Water was added (20 mL) and the crude product extracted with hexanes (3x15mL). The combined organic extracts were washed with brine (30mL), dried over MgSO<sub>4</sub>, and concentrated under reduced pressure. The crude material was purified by column chromatography, eluting with 10% dichloromethane in hexanes, to afford the pure product (1.5 g, 70%) as a colorless oil. EI/GCMS (m/z) [M]<sup>+</sup> calculated for C<sub>18</sub>H<sub>31</sub>O<sub>2</sub>SiBr, 386.1271; found 386.1282. <sup>1</sup>H NMR (CDCl<sub>3</sub>, 300 MHz): δ 7.03-6.92 (m, 2H), 6.73 (d, *J* = 8.5 Hz, 1H), 3.92 (t, *J* = 6.45 ppm, 2H), 1.87-1.78 (m, 2H), 1.58-1.43 (m, 2H), 1.43-1.30 (m, 4H), 1.03 (s, 9H), 0.94 (t, *J* = 5.7, 3H), 0.18 (s, 6H) ppm. <sup>13</sup>C NMR (CDCl<sub>3</sub>, 75 MHz): 151.41, 144.15, 123.23, 122.00, 116.06, 113.44, 68.61, 31.58, 29.21, 2580, 25.64, 25.55, 22.60, 18.31, 14.03, -4.70 ppm.

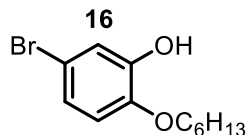

**Compound 16:** To a solution of **15** (2.3 g, 8.01 mmol) in dichloromethane (52mL) was added meta-chloroperoxybenzoic acid (2.6 g, 14.9 mmol) in small portions, and the solution stirred at 40°C overnight. A 2M solution of ammonia in methanol (12.1 mL) was added, and the mixture was stirred for 2 hours. Saturated sodium bicarbonate was added (30 mL), and the product was extracted with diethyl ether (3 x 30mL). The combined organic layers were washed with saturated sodium bicarbonate (100mL) and brine (100 mL), dried over MgSO<sub>4</sub>, and concentrated in vacuo to afford the pure product, isolated as an off-white solid (2.2 g, 99%). Mp = 41.8-42.6°C. EI/GCMS (m/z) [M]<sup>+</sup> calculated for C<sub>12</sub>H<sub>17</sub>O<sub>2</sub>Br, 272.0406; found 272.0339. <sup>1</sup>H NMR (CDCl<sub>3</sub>, 300 MHz): δ 7.08 (d, *J* = 2.4 Hz, 1H), 6.95 (dd, *J* = 8.7, 2.5 Hz, 1H), 6.71 (d, *J* = 8.8 Hz, 1H), 5.67 (s, 1H), 4.02 (t, *J* = 6.7, 2H), 1.86-1.77 (m, 2H), 1.49-1.40 (m, 2H), 1.38-1.30 (m, 4H), 0.92 (t, *J* = 7.3 Hz, 3H) ppm. <sup>13</sup>C NMR (CDCl<sub>3</sub>, 75 MHz): 146.86, 145.49, 122.97, 117.97, 113.25, 112.96, 69.42, 31.77, 29.32, 25.88, 22.83, 14.28 ppm.

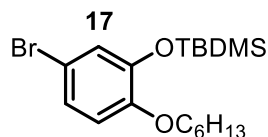

**Compound 17:** Under an inert atmosphere, Compound **16** (541 mg, 1.98 mmol) was dissolved in dimethylformamide (2 mL) and diisopropylethylamine (0.54 mL, 3.17 mmol) was added dropwise. The solution was stirred for 15 minutes, tertbutyldimethylsilylchloride (448 mg, 2.97 mmol) was added, and the solution stirred overnight. Water was added (10 mL) and the crude product extracted with hexanes (3x10mL). The combined organic extracts were washed with brine (20mL), dried over MgSO<sub>4</sub>, and concentrated under reduced pressure. The crude material was subjected to high vacuum to remove volatiles and afford the pure product (725 mg, 95%) as a yellow oil. EI/GCMS (m/z) [M]<sup>+</sup> calculated for C<sub>18</sub>H<sub>31</sub>O<sub>2</sub>SiBr, 386.1271; found 386.1258. <sup>1</sup>H NMR (CDCl<sub>3</sub>, 300 MHz): δ 6.96 (d, *J* = 2.5 Hz, 1H), 6.91 (dd, *J* = 8.2, 2.4 Hz, 1H), 6.70 (d, *J* = 8.5, 1H), 3.90 (t, *J* = 7.0 Hz, 2H), 1.85-1.76 (m, 2H), 1.52-1.42 (m, 2H), 1.36-1.28 (m, 4H), 1.00 (s, 9H), 0.89 (t, *J* = 7.6 Hz, 3H), 0.15 (s, 6H) ppm. <sup>13</sup>C NMR (CDCl<sub>3</sub>, 75 MHz): 150.03, 145.83, 124.37, 124.01, 113.93, 111.94, 68.61, 31.61, 29.28, 25.78, 25.62, 22.61, 18.33, 14.04, -4.70 ppm.

#### General procedure to prepare aryl pinacolboranes from aryl halides.

A mixture of aryl halide, bis(acetonitrile)dichloropalladium (II) (1 mol%), and Sphos Buchwald ligand (4 mol %) was prepared in a pressure flask, and immediately subjected to a vacuum/N<sub>2</sub> cycle (3x). To the solids was added dry 1,4-dioxane (1.7M with respect to aryl halide), and dry triethylamine (1.5 equivalents) under N<sub>2</sub>. Last, pinacolborane (1.5 equivalents) was added quickly and the flask capped tightly. The mixture was stirred at 100°C until the reaction mixture darkened and thickened (around 3 hours). The mixture was allowed to cool, diluted with diethyl ether, and filtered over a pad of Celite. The filtrate was concentrated under reduced pressure, and the crude material purified by column chromatography.

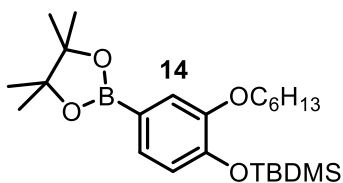

**Compound 14:** Reaction scale: Compound **13** (1.5 g, 3.87 mmol). The product eluted from the column with 20% dichloromethane in hexanes, and was isolated as a yellow oil (1.28 g, 76%). ESI/APCI (m/z) [MH]<sup>+</sup> calculated for C<sub>24</sub>H<sub>44</sub><sup>11</sup>BO<sub>4</sub>Si, 435.3096; found 435.3110. <sup>1</sup>H NMR (CDCl<sub>3</sub>, 300 MHz): δ 7.32-7.27 (m, 1H), 6.35 (d, *J* = 7.9 Hz, 1H), 3.99 (t, *J* = 6.9, 1H), 1.90-1.76 (m, 2H), 1.51-1.45 (m, 2H), 1.34 (s, 12H), 1.31-1.18 (m, 4H), 1.01 (s, 9H), 0.91 (t, *J* = 6.9 Hz, 3H), 0.17 (s, 6H) ppm. <sup>13</sup>C NMR (CDCl<sub>3</sub>, 75 MHz): 150.20, 147.94, 128.00, 120.63, 118.48, 83.53, 68.33, 31.65, 29.48, 25.84, 25.70, 25.67, 24.86, 22.62, 18.42, 14.07, -4.61 ppm.

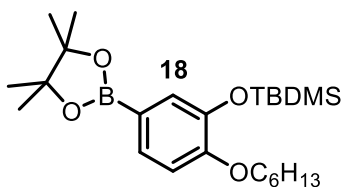

**Compound 18:** Reaction Scale: Compound **17** (355 mg, 0.916 mmol). The product eluted from the column with 30% dichloromethane in hexanes, and was isolated as a yellow solid (312 mg, 78%). Mp = 69.2 - 71.1°C. ESI/APCI (m/z) [MH]<sup>+</sup> calculated for C<sub>24</sub>H<sub>44</sub><sup>11</sup>BO<sub>4</sub>Si, 435.3096; found 435.3104. <sup>1</sup>H NMR (CDCl<sub>3</sub>, 300 MHz): δ 7.38 (dd, *J* = 8.1, 1.6 Hz, 1H), 7.27-7.24 (m, 1H), 6.84 (d, *J* = 8.2 Hz, 1H), 3.96 (t, *J* = 6.7 Hz, 2H), 1.87-1.76 (m, 2H), 1.52-1.42 (m, 2H), 1.33 (s, 12H), 1.30-1.23 (m, 4H), 1.01 (s, 9H), 0.91 (t, *J* = 6.6 Hz, 3H), 0.17 (s, 6H) ppm. <sup>13</sup>C NMR (CDCl<sub>3</sub>, 75 MHz): 159.29, 144.16, 129.20, 126.90, 111.85, 83.38, 68.15, 31.62, 29.28, 25.78, 25.73, 25.71, 24.81, 22.59, 18.36, 14.03, -4.59 ppm.

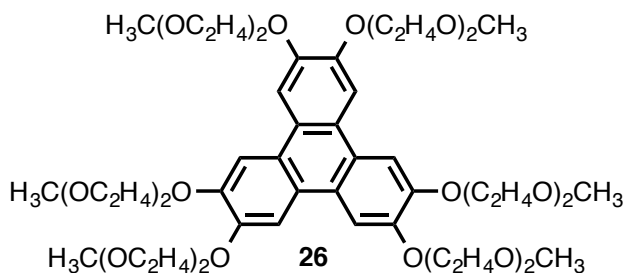

**Compound 26:** Hexakis(monomethyl di(ethylene glycol)) triphenylene: To a mixture of 2,3,6,7,10,11-hexahydroxytriphenylene (105 mg, 0.324 mmol), potassium carbonate (447 mg, 3.24 mmol), and catalytic 18-C-6 was added dimethylformamide (3.2 mL) and di(ethylene glycol) monomethyl ether tosylate (710 mg, 2.59 mmol) under nitrogen. The reaction solution was stirred at 80°C overnight. The solution was allowed to cool, and water was added. Excess di(ethylene glycol) monomethyl ether tosylate was extracted from the aqueous layer with diethyl ether (2x). The combined ethereal extracts were washed with aqueous hydrochloric acid (1M), and the aqueous layers combined. The product was extracted from the aqueous phase with ethyl acetate (3x), and the ethyl acetate phase washed with brine, dried over MgSO<sub>4</sub>, and concentrated under reduced pressure to afford analytically pure product (183 mg, 30%). The product was isolated as a dark oil which gradually solidified. ESI/APCI (m/z) [MNa]<sup>+</sup> calculated for C<sub>48</sub>H<sub>72</sub>O<sub>18</sub>Na, 959.4611; found 959.4634. <sup>1</sup>H NMR (300 MHz, CDCl<sub>3</sub>): δ 7.88 (s, 6H), 4.42 (t, *J* = 4.6 Hz, 12H), 4.01 (t, *J* = 4.4 Hz, 12H), 3.80-3.83 (m, 12H), 3.61-3.63 (m, 12H), 3.41 (s, 18H) ppm. <sup>13</sup>C NMR (CDCl<sub>3</sub>, 75 MHz): 148.41, 123.62, 107.61, 71.76, 70.54, 69.64, 68.89, 58.81 ppm.

### III. $^1\text{H}$ and $^{13}\text{C}$ NMR Spectra

#### Compound 1.

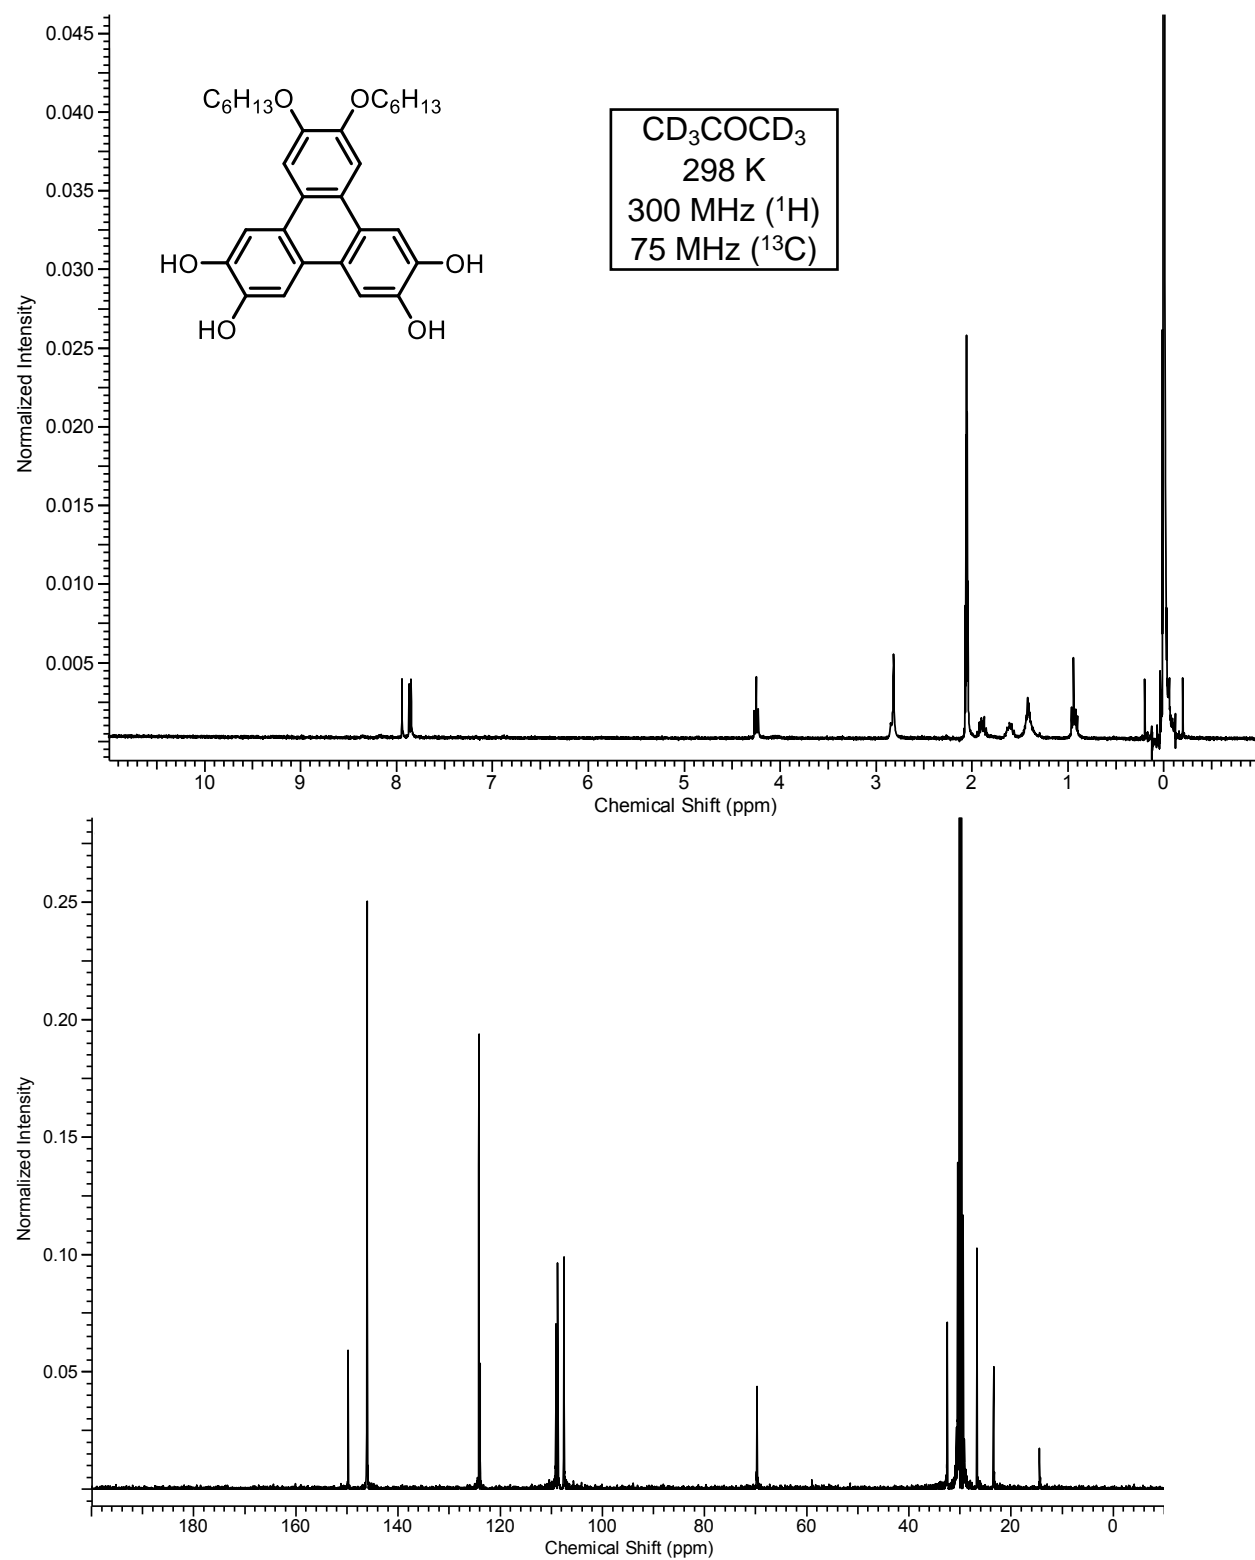

## Compound 2

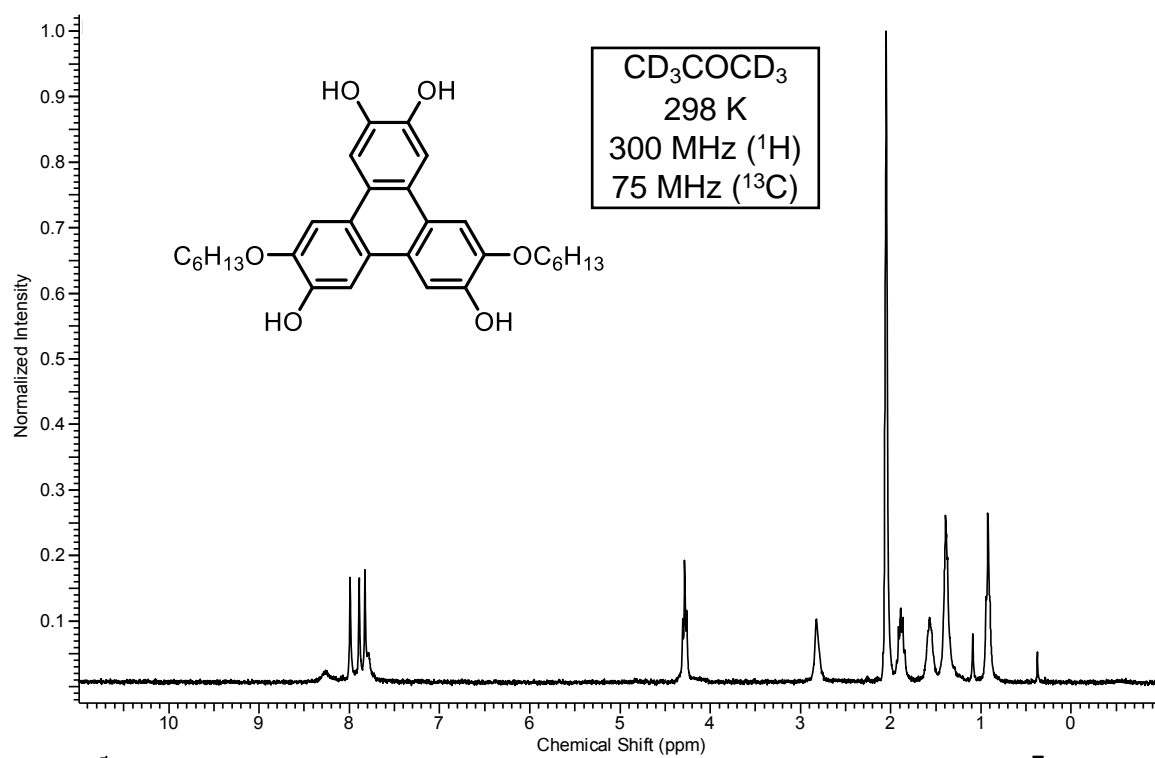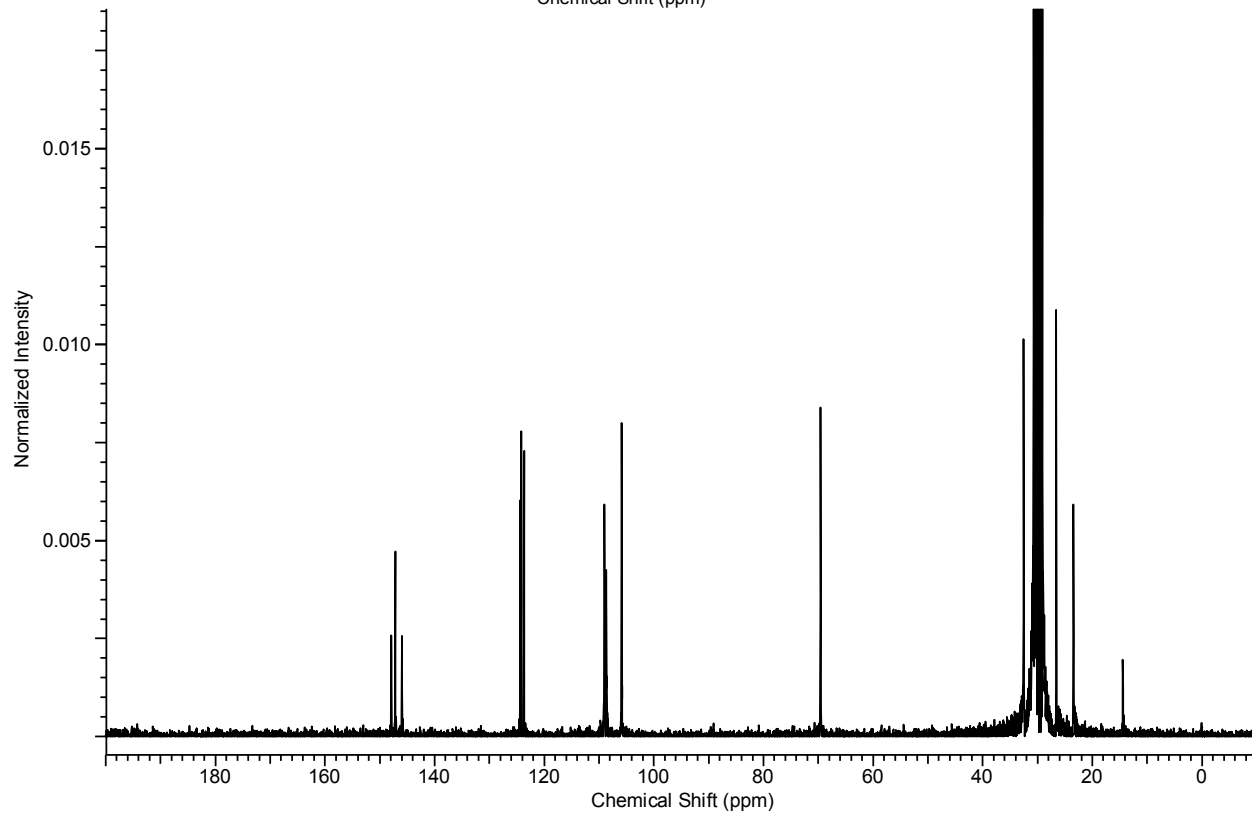

### Compound 3

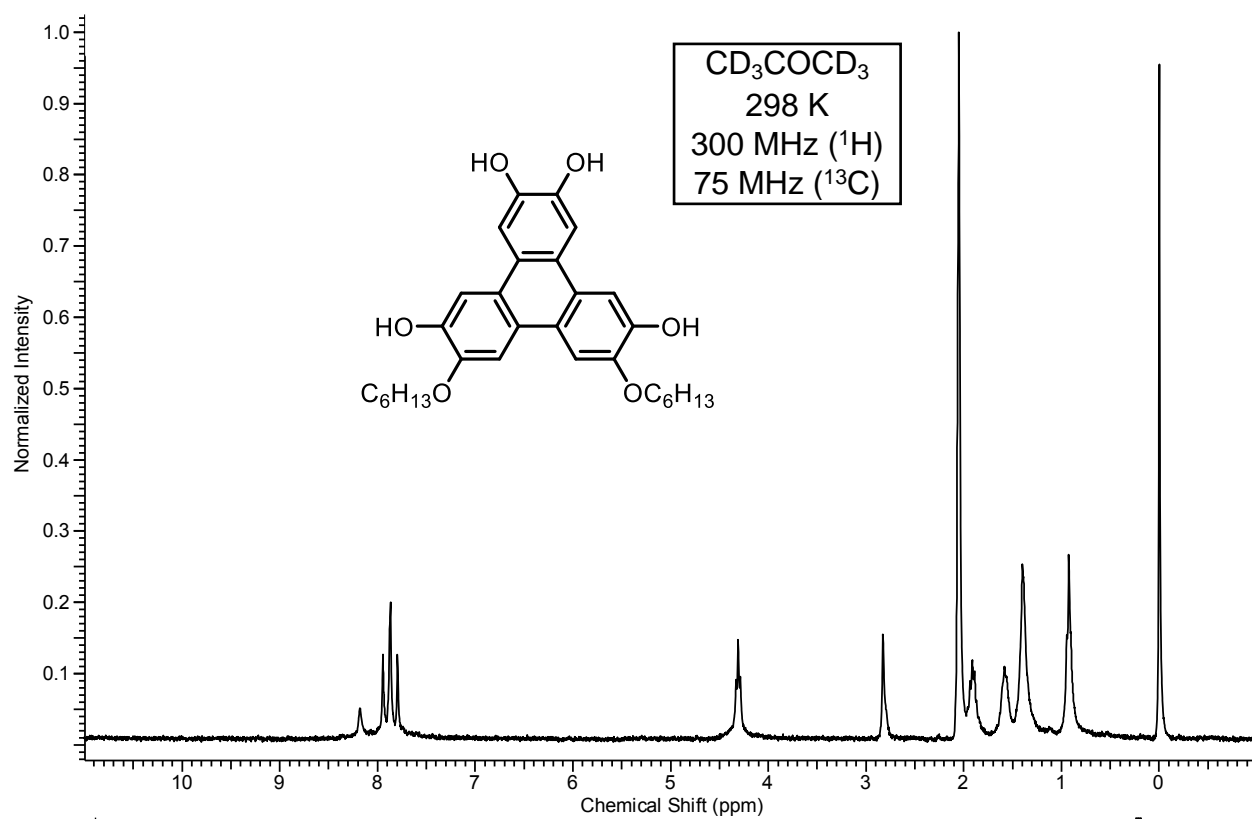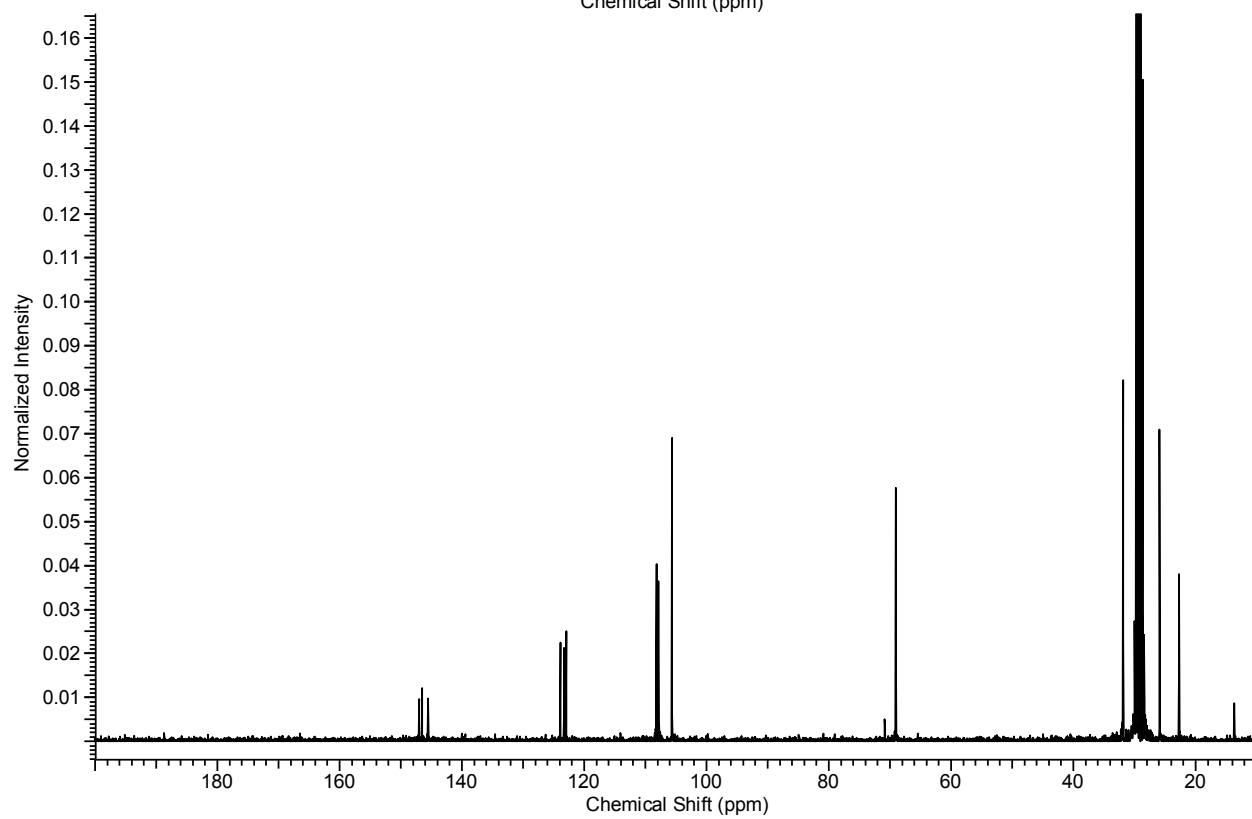



### Compound 4

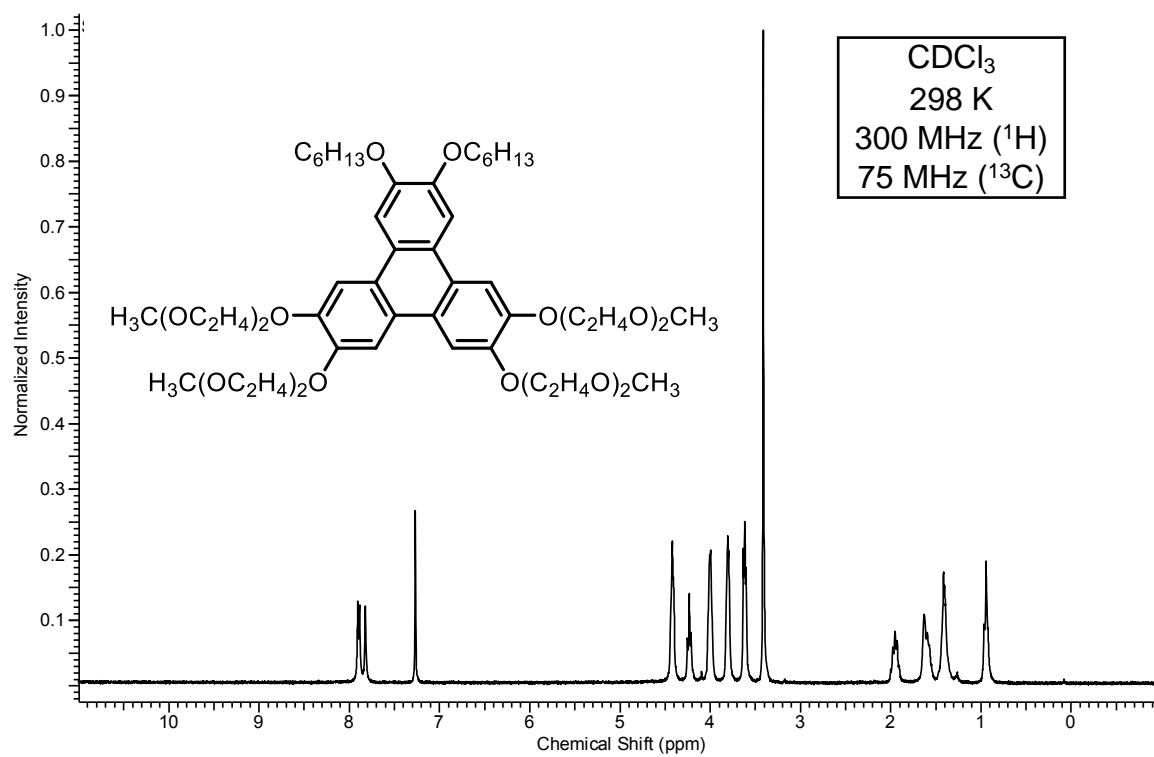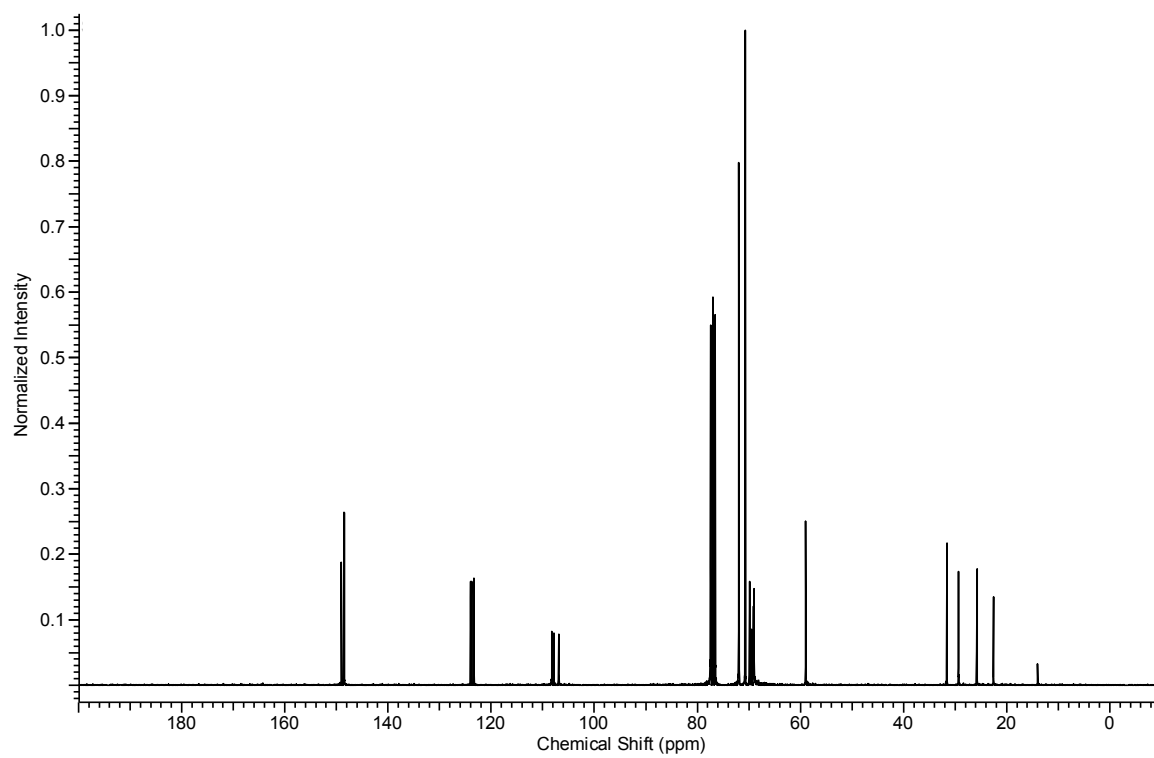

### Compound 5

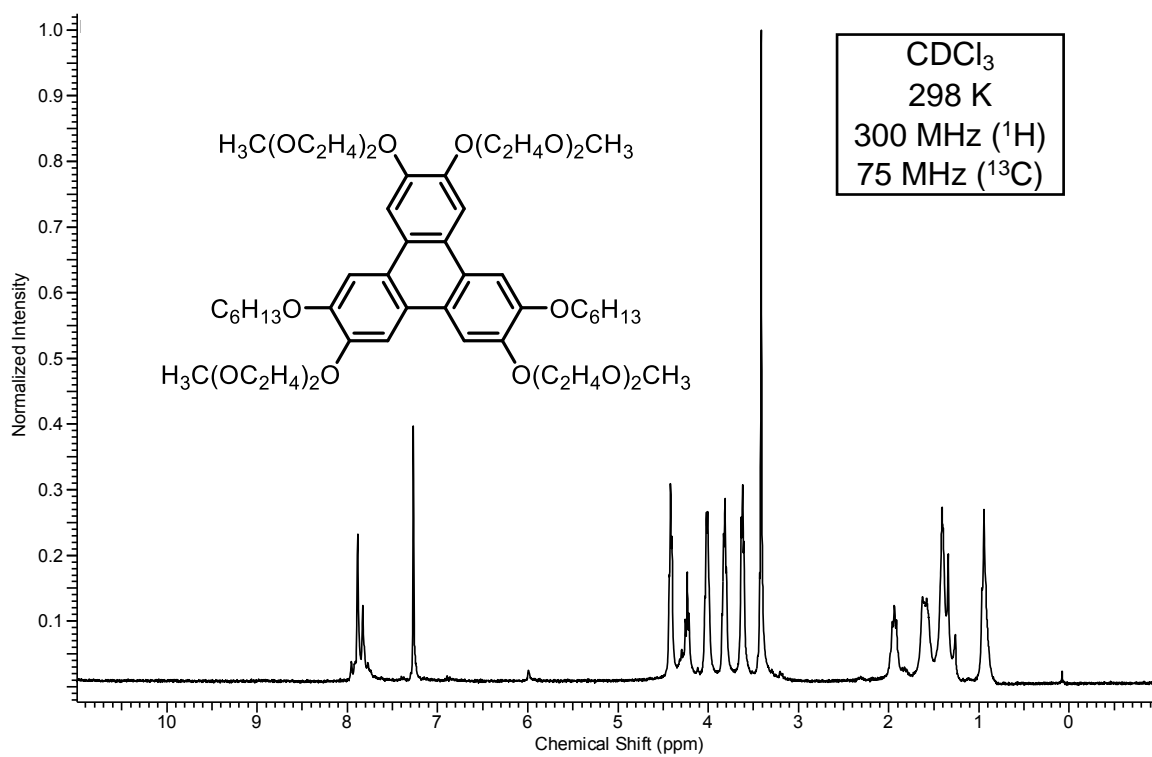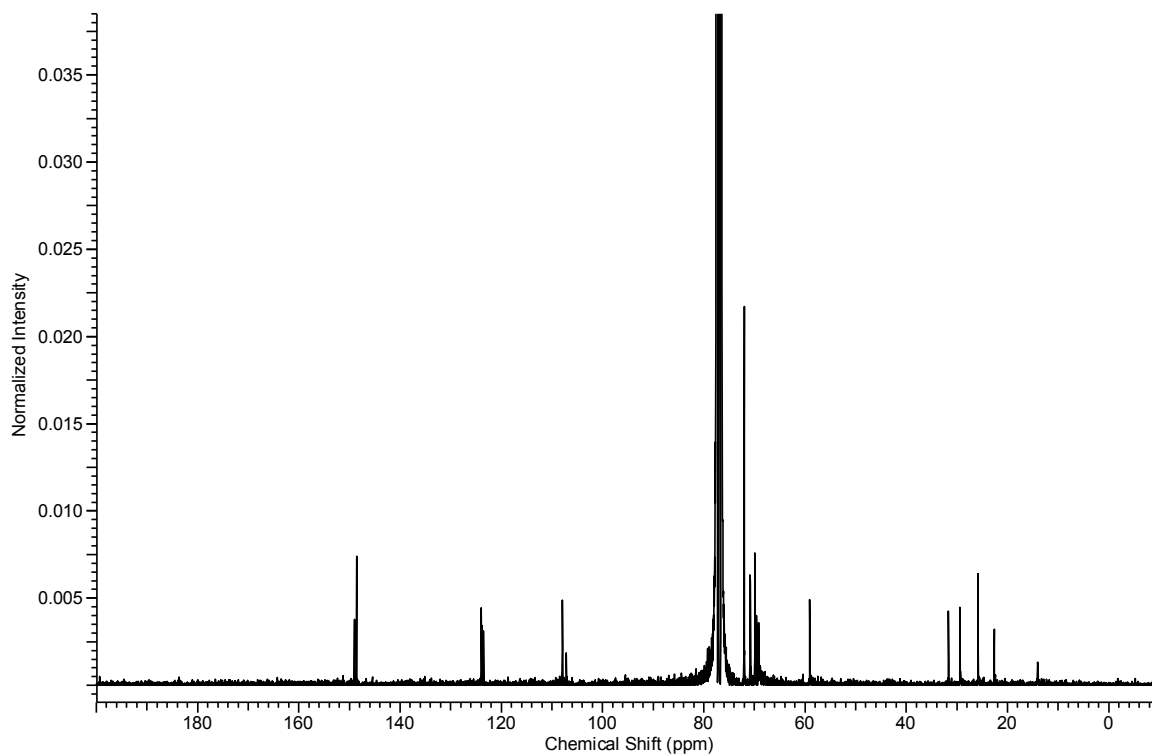

### Compound 6

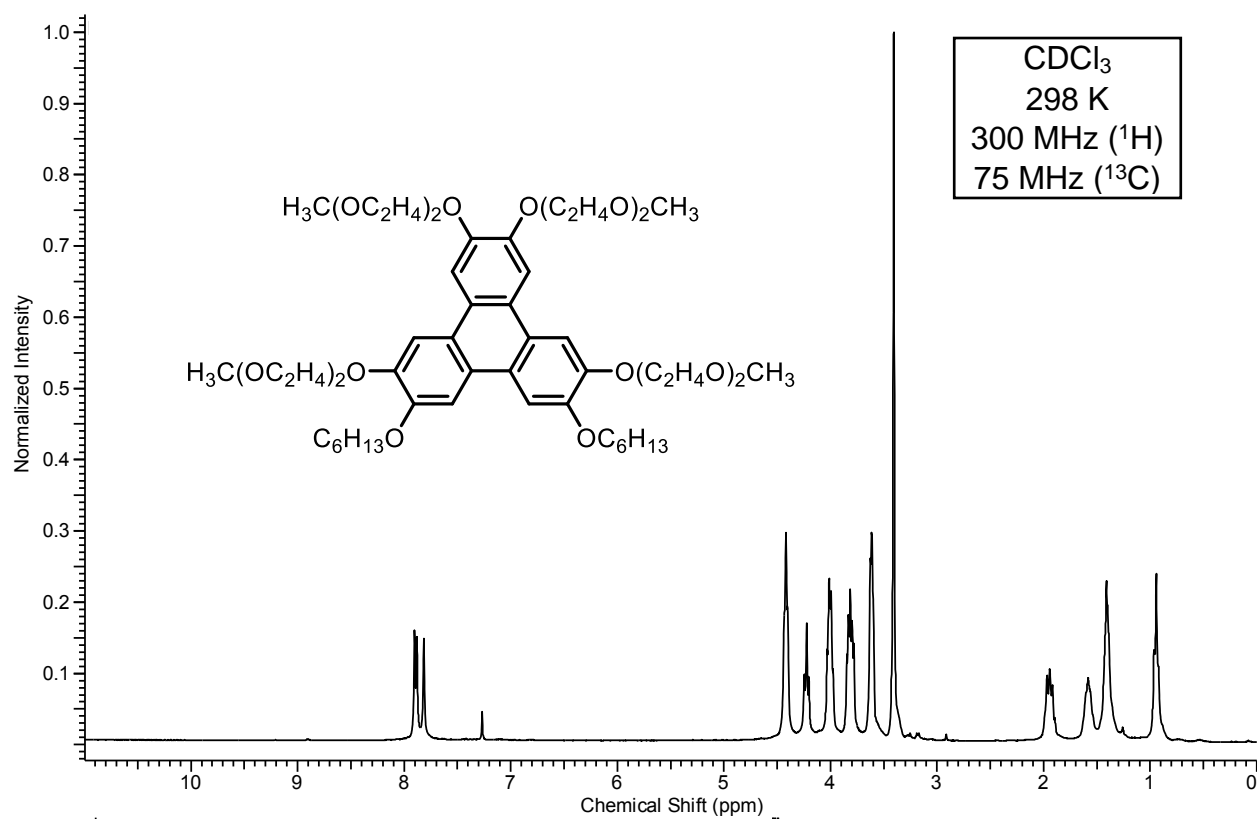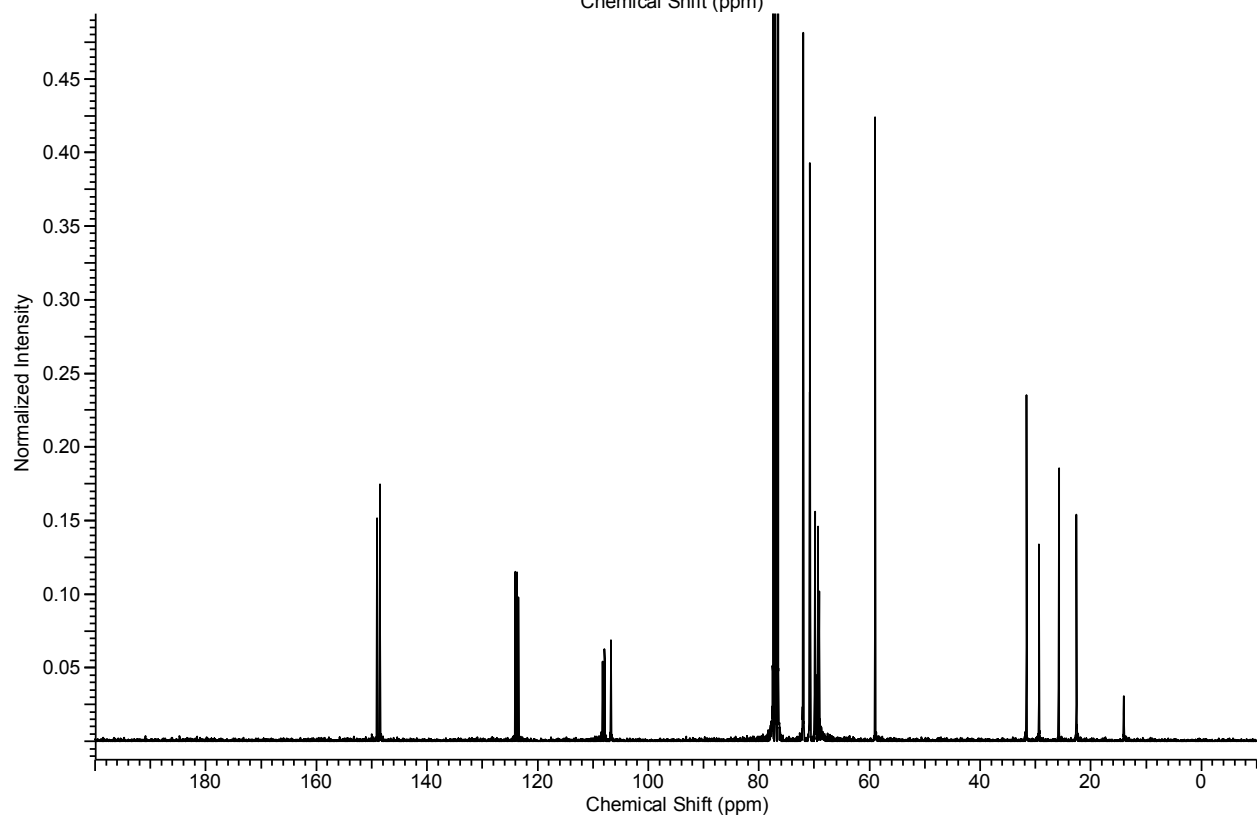

# Compound 9

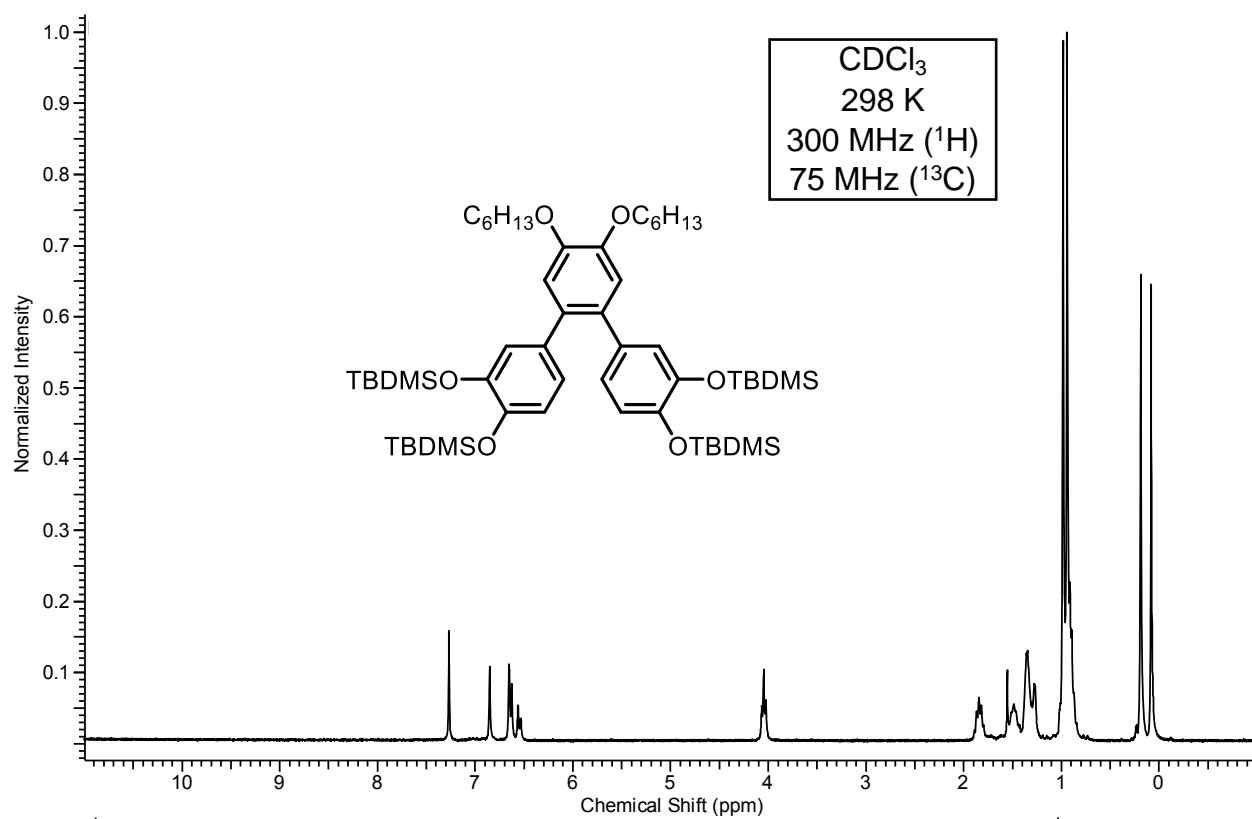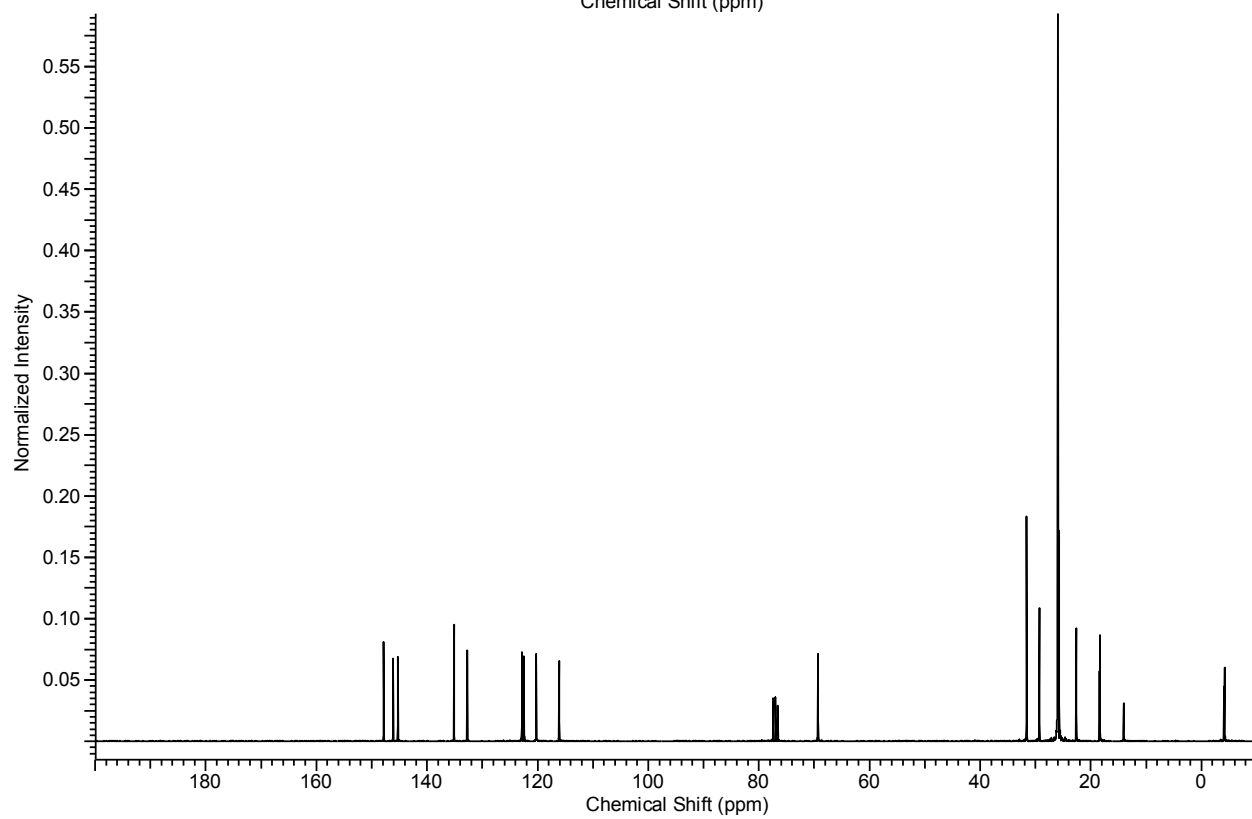

# Compound 10

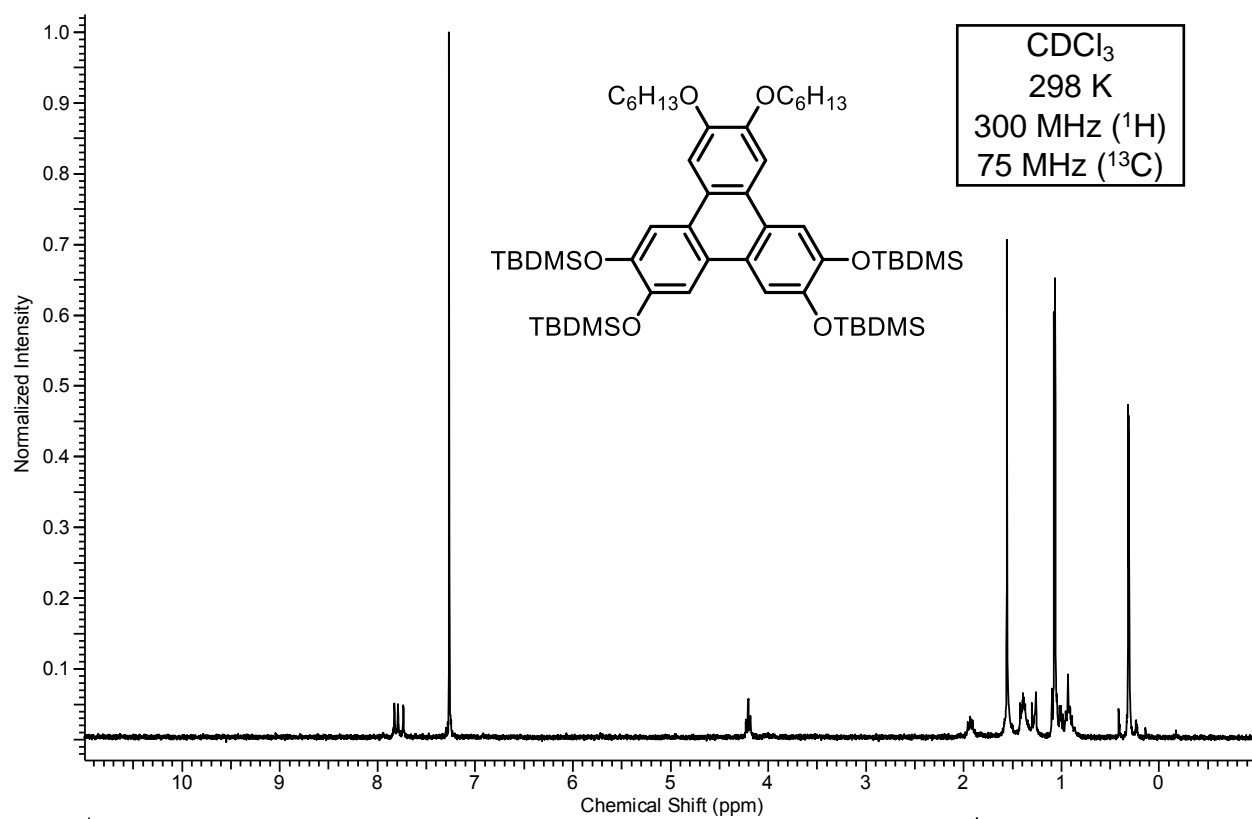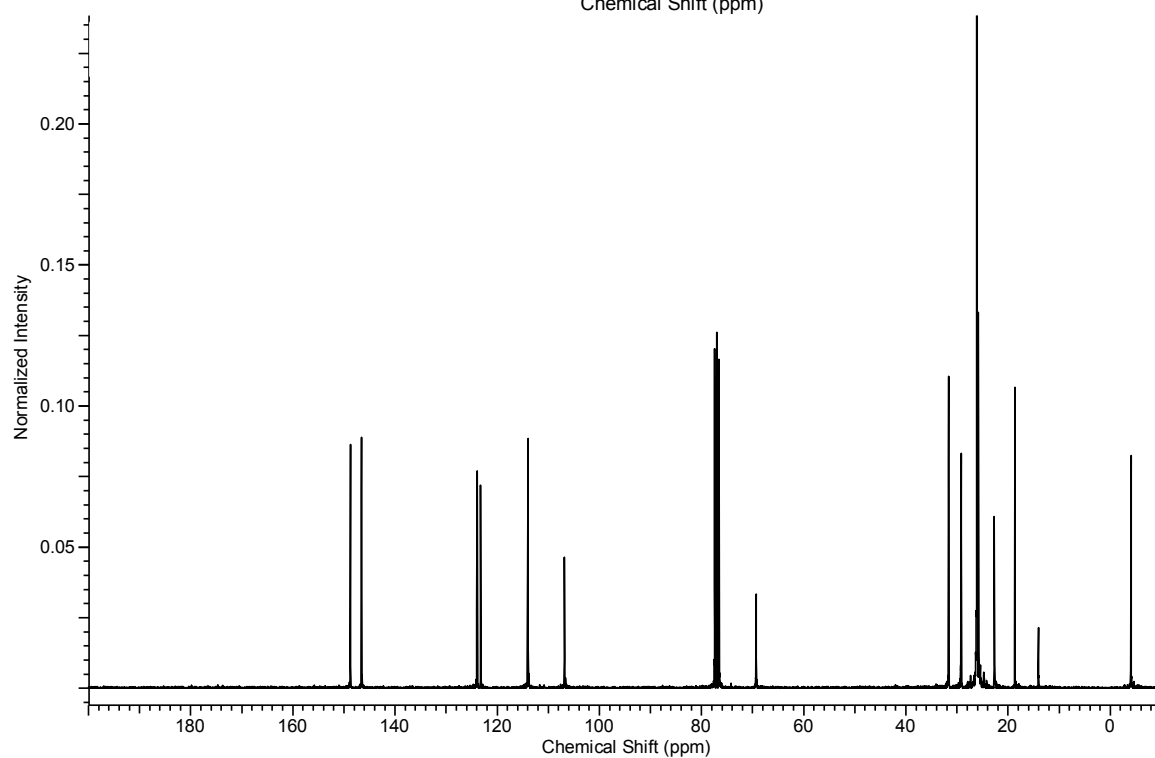

### Compound 13

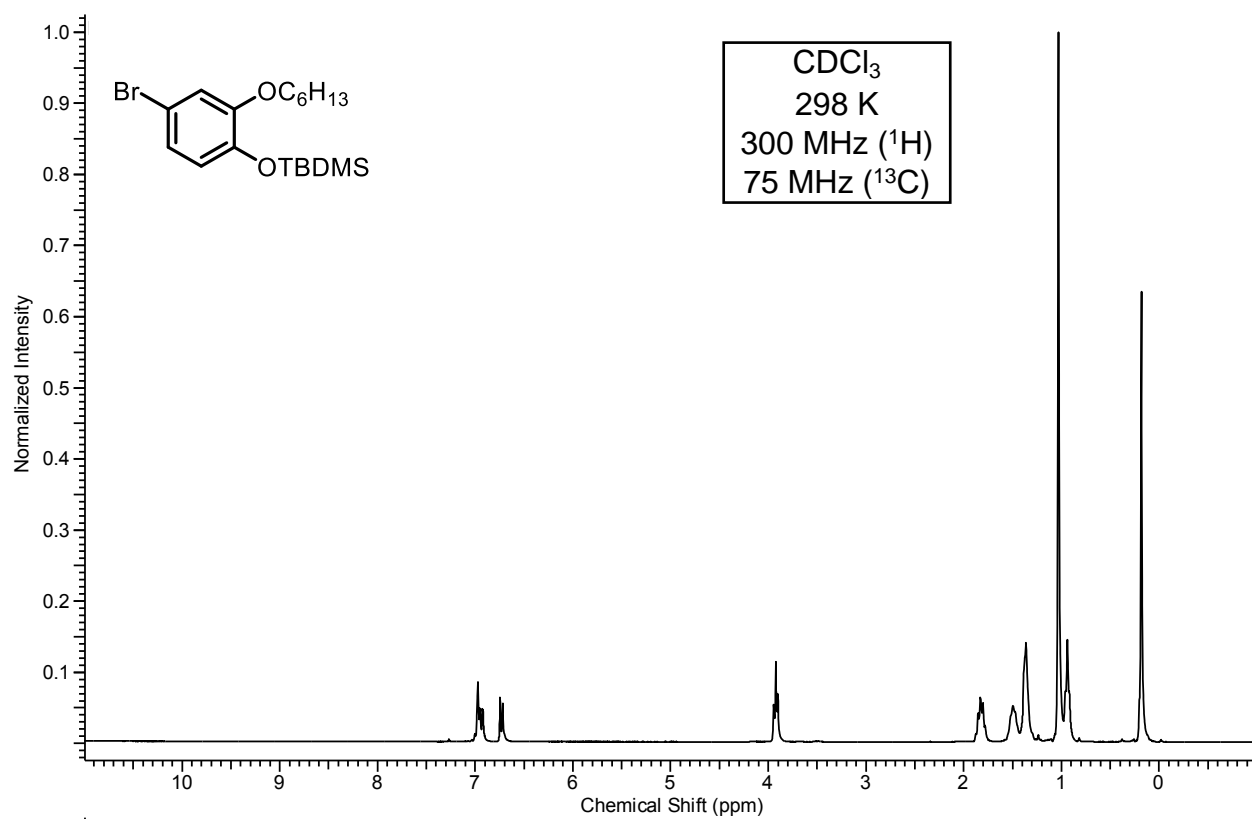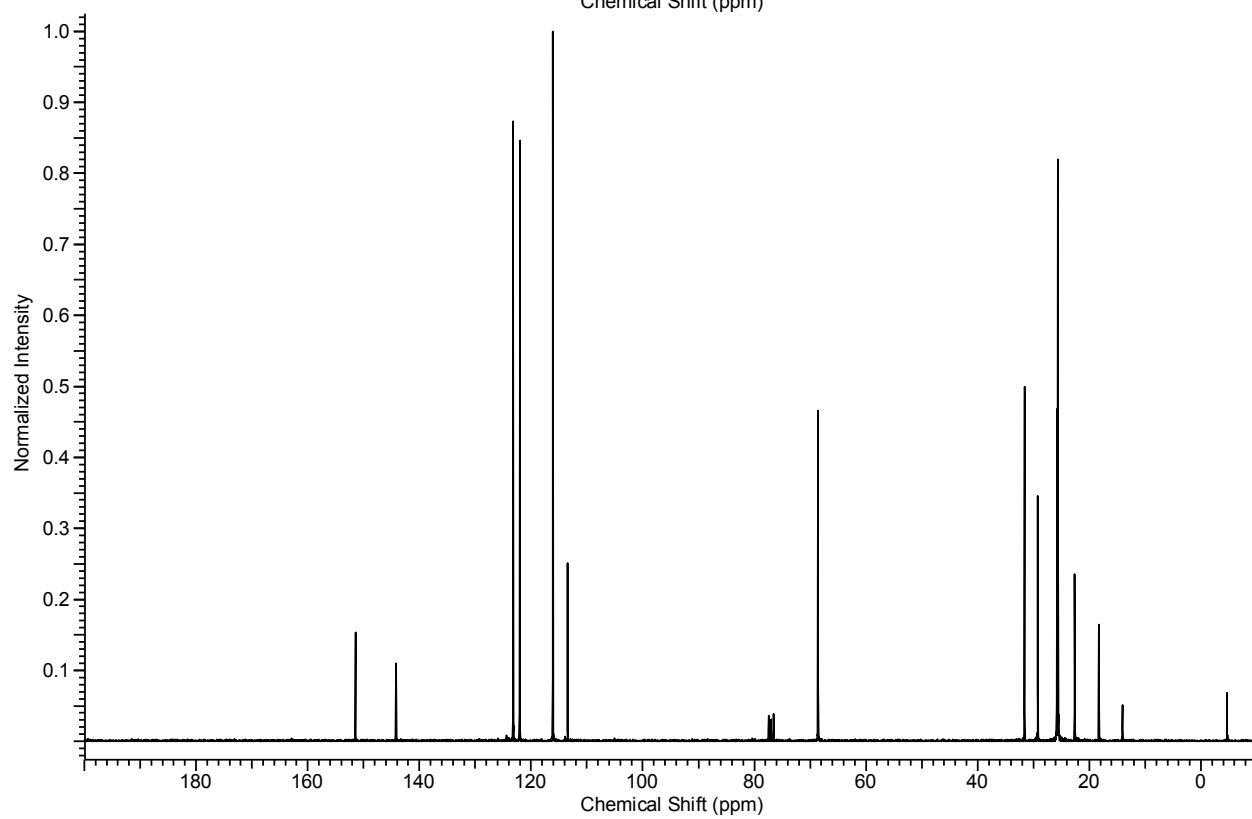

# Compound 14

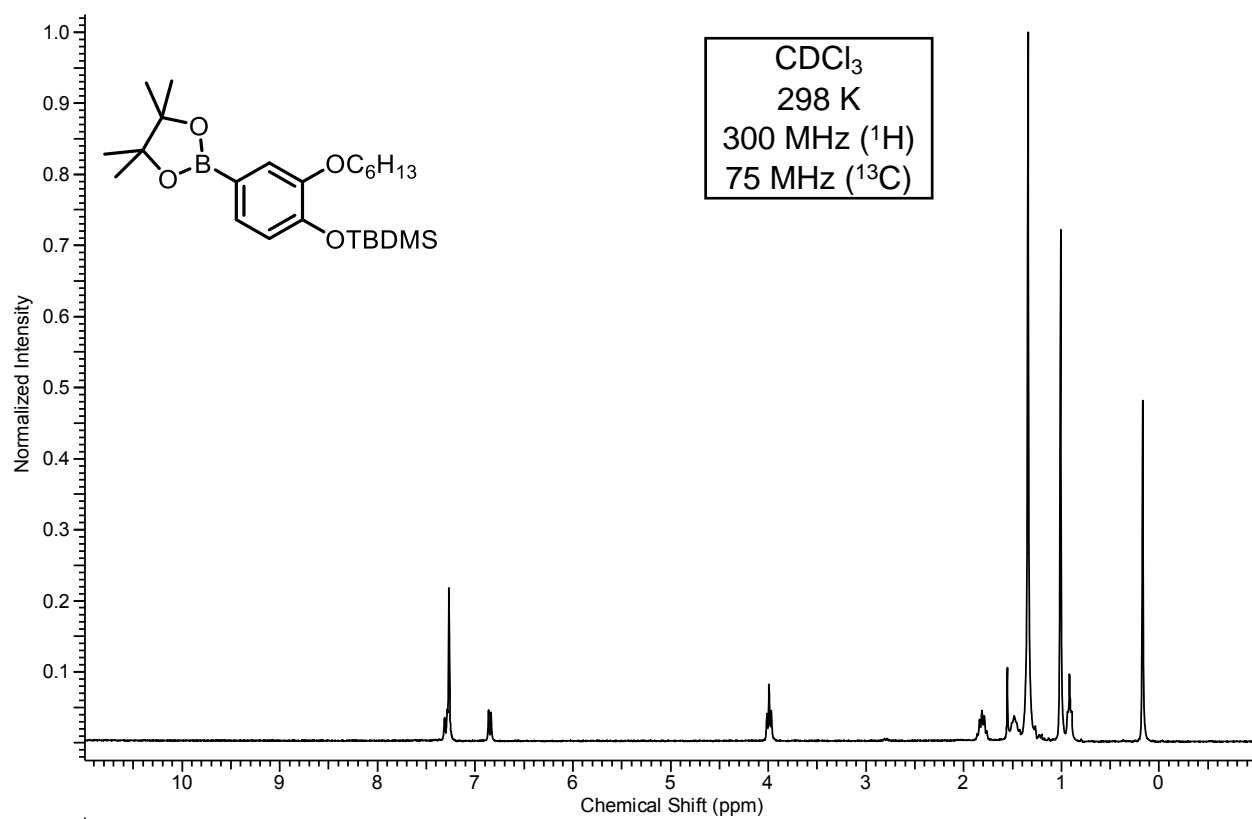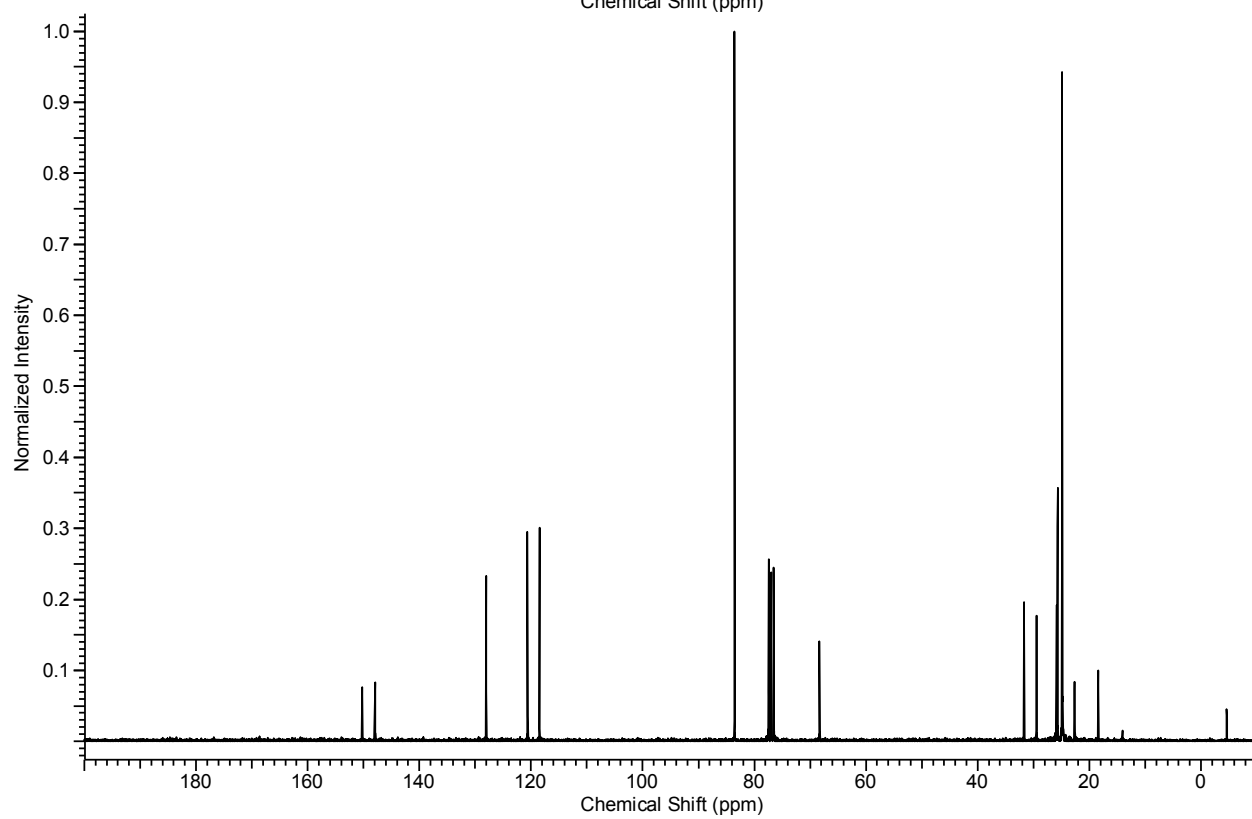

# Compound 16

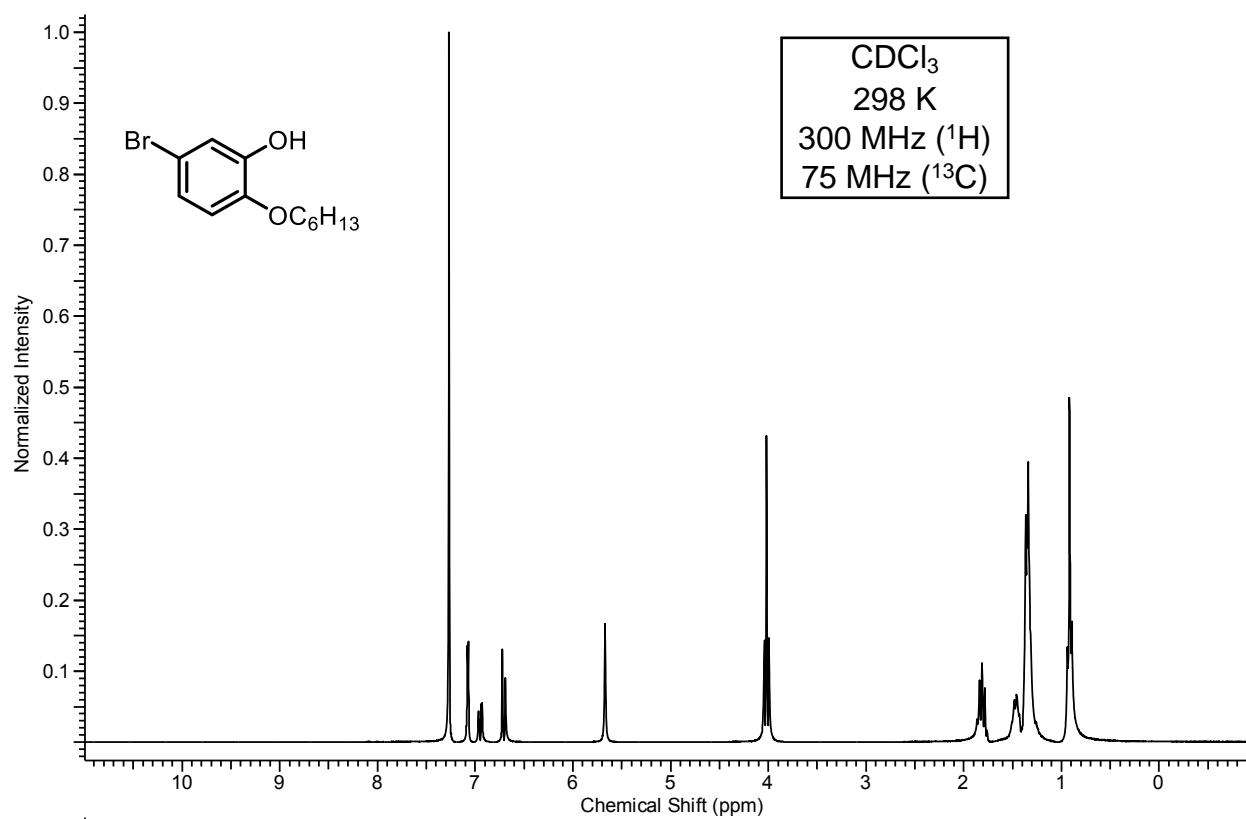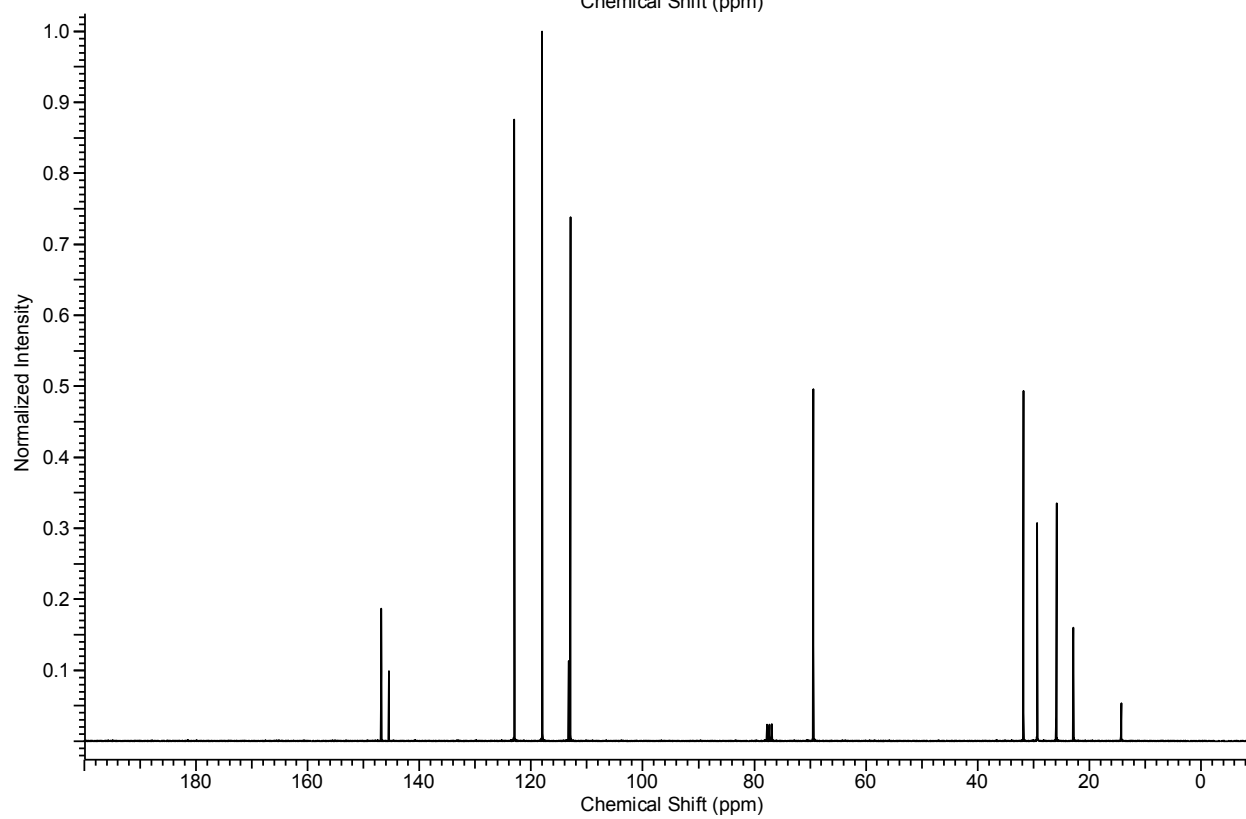



# Compound 17

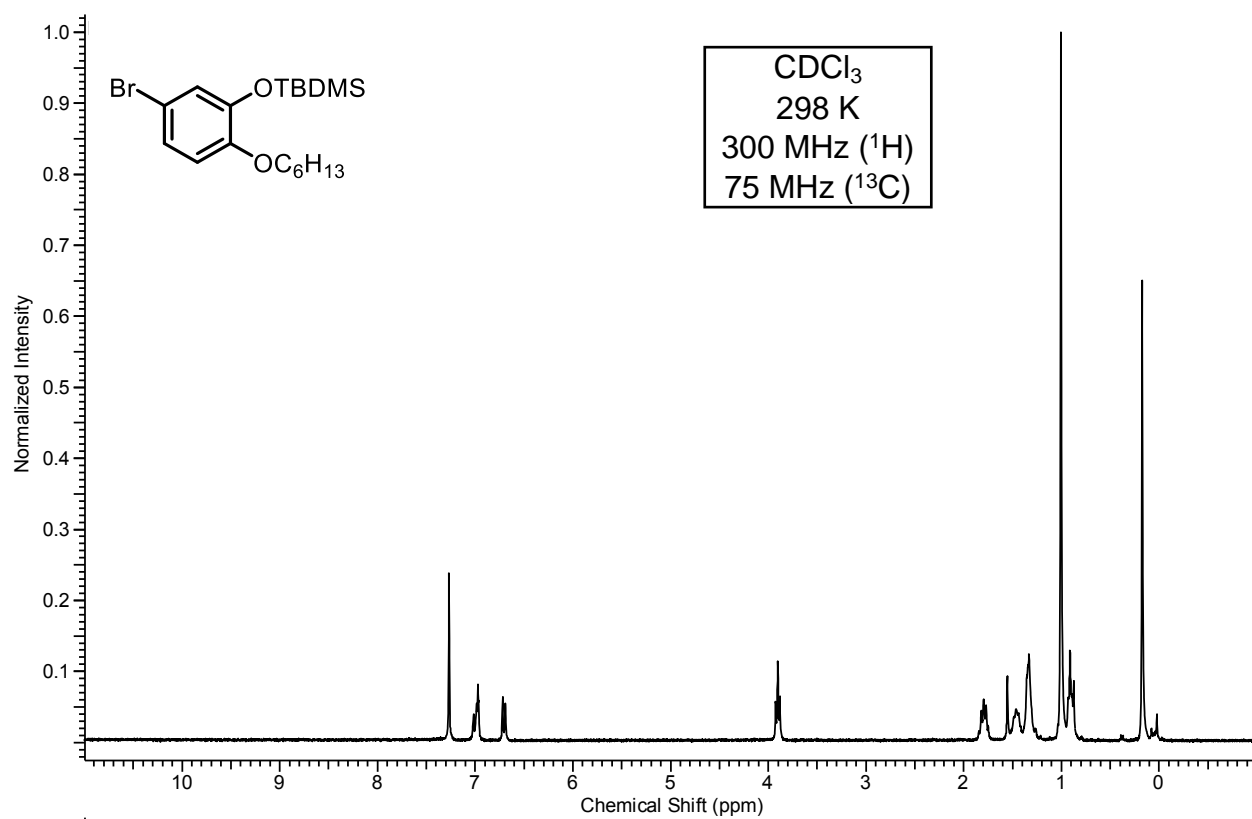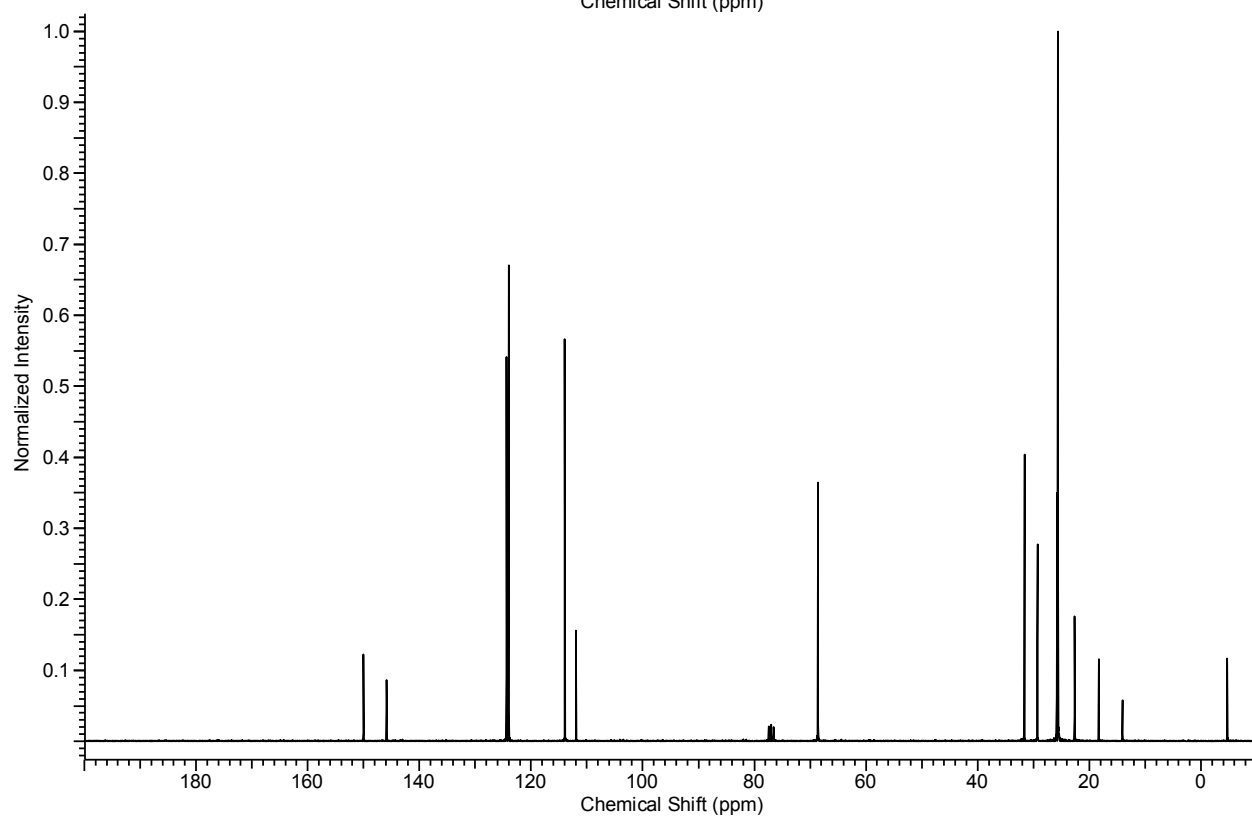

# Compound 18

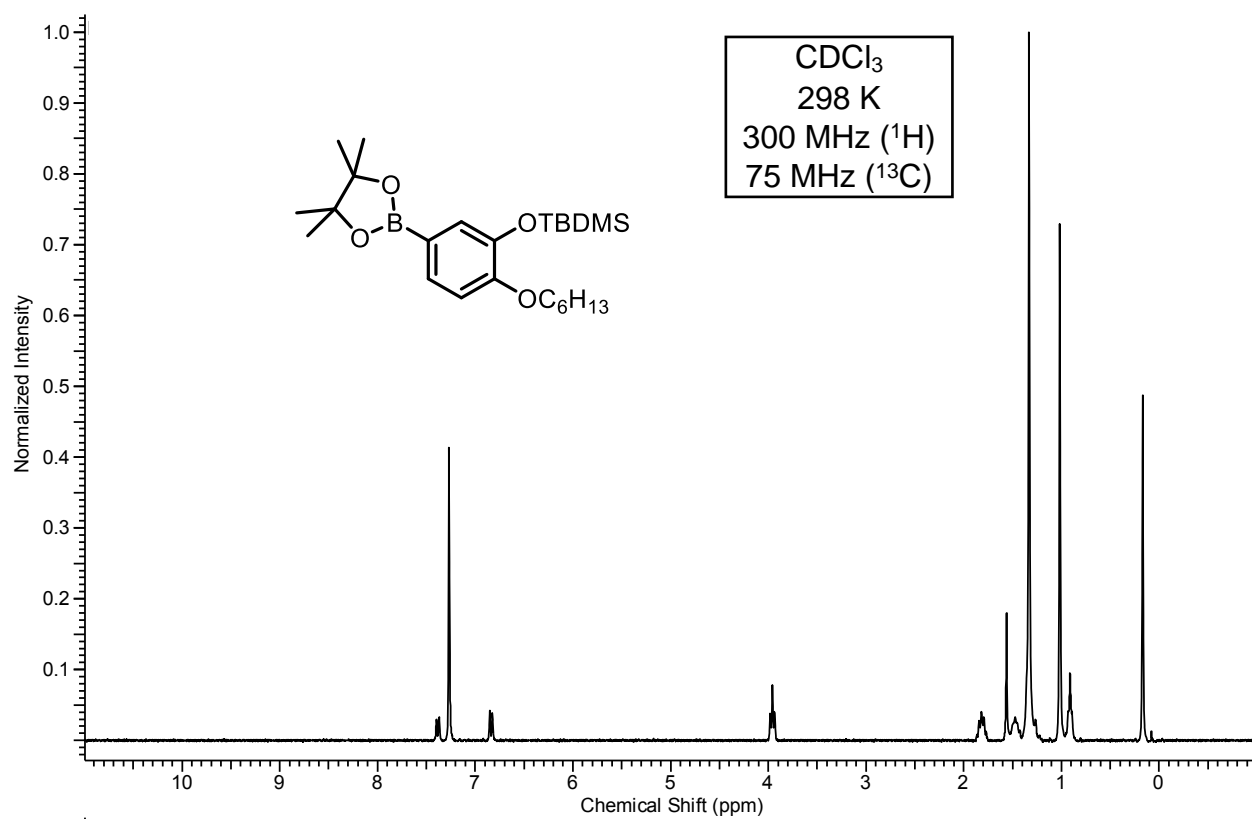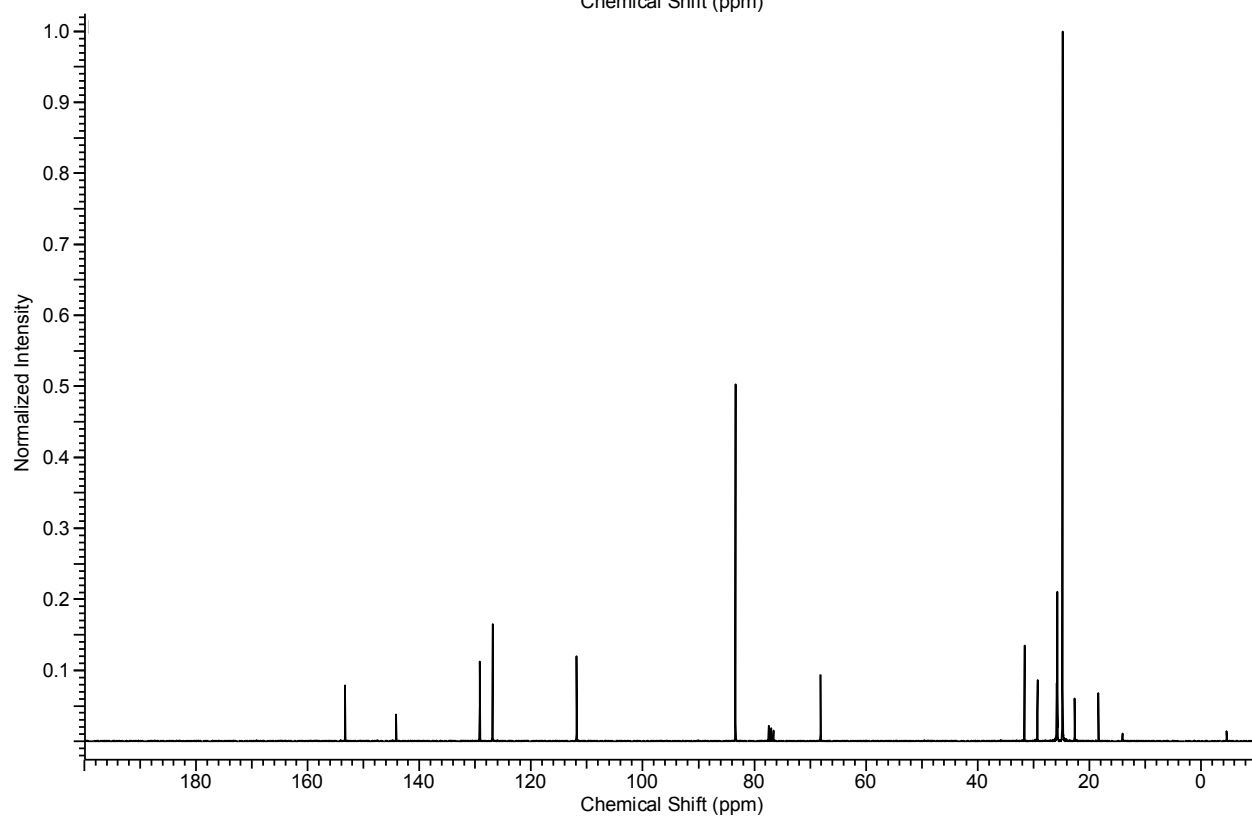



# Compound 21

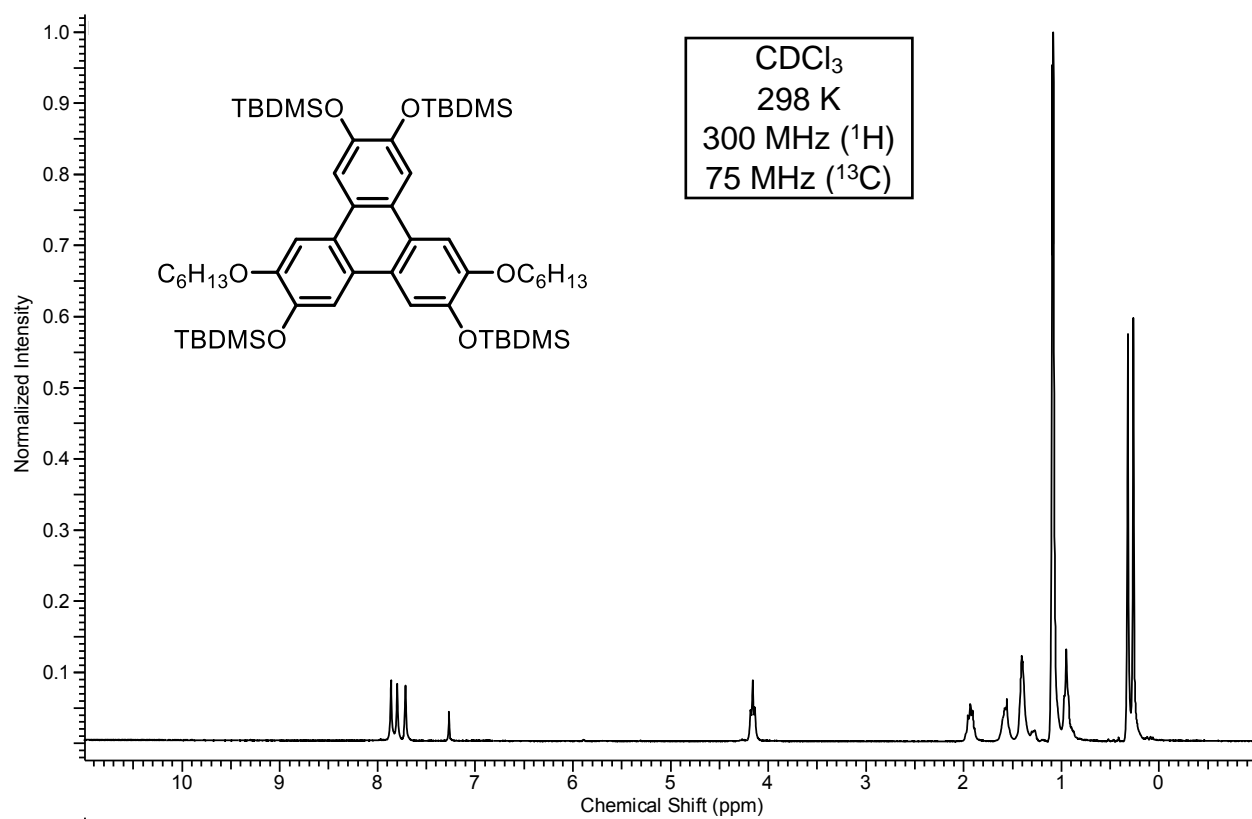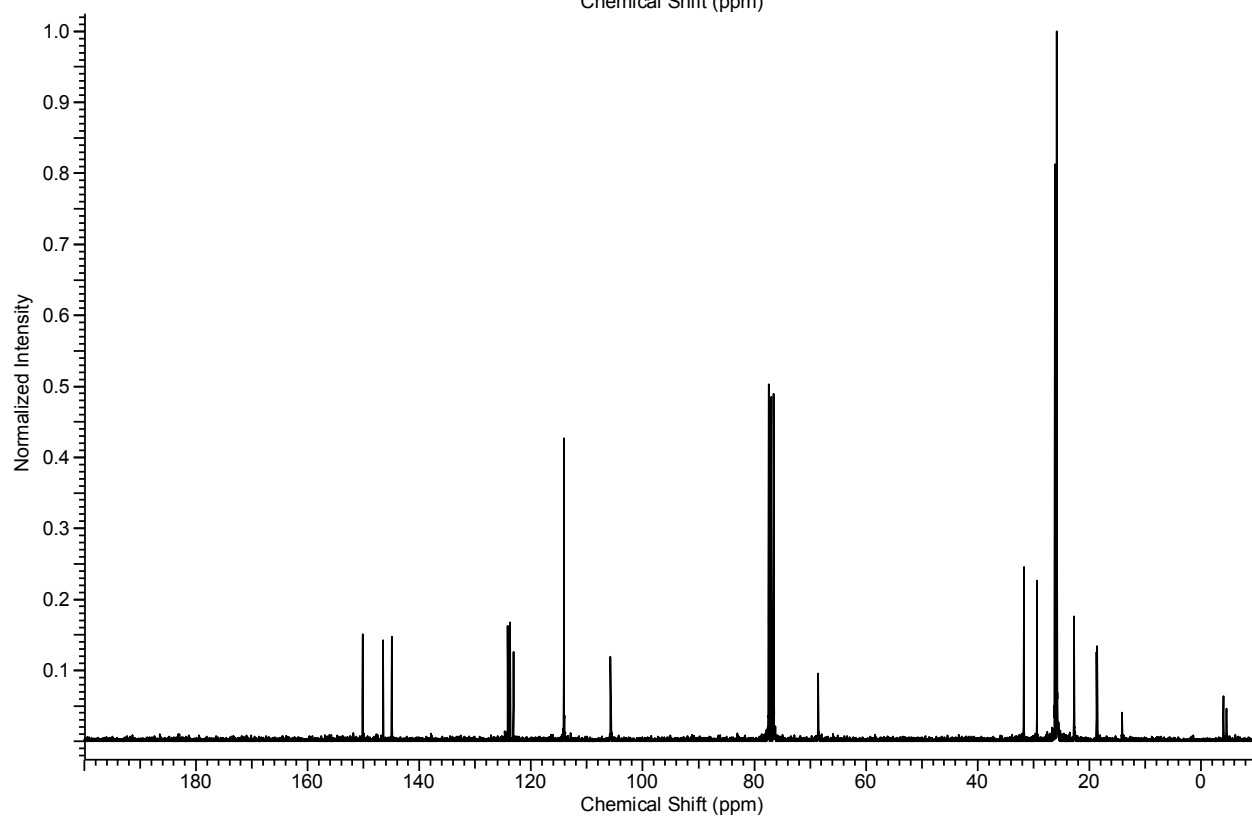

# Compound 22

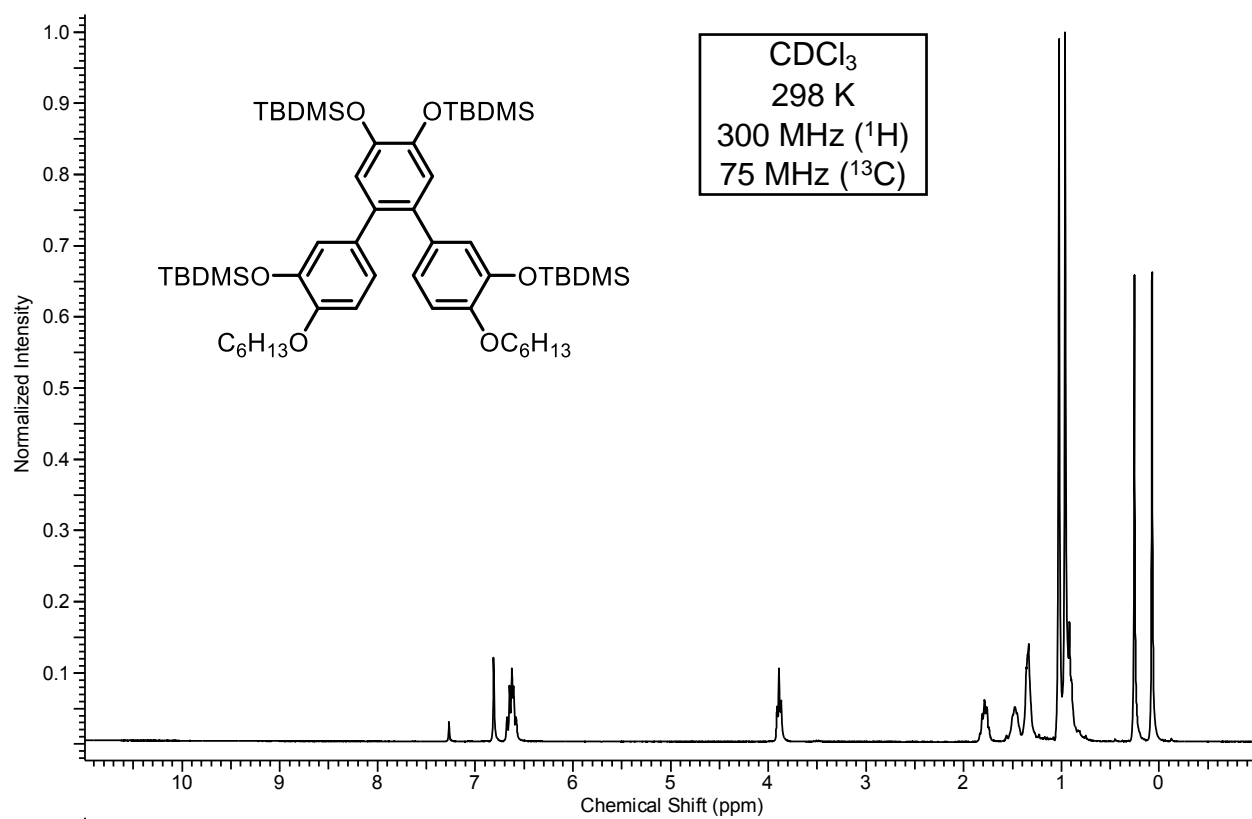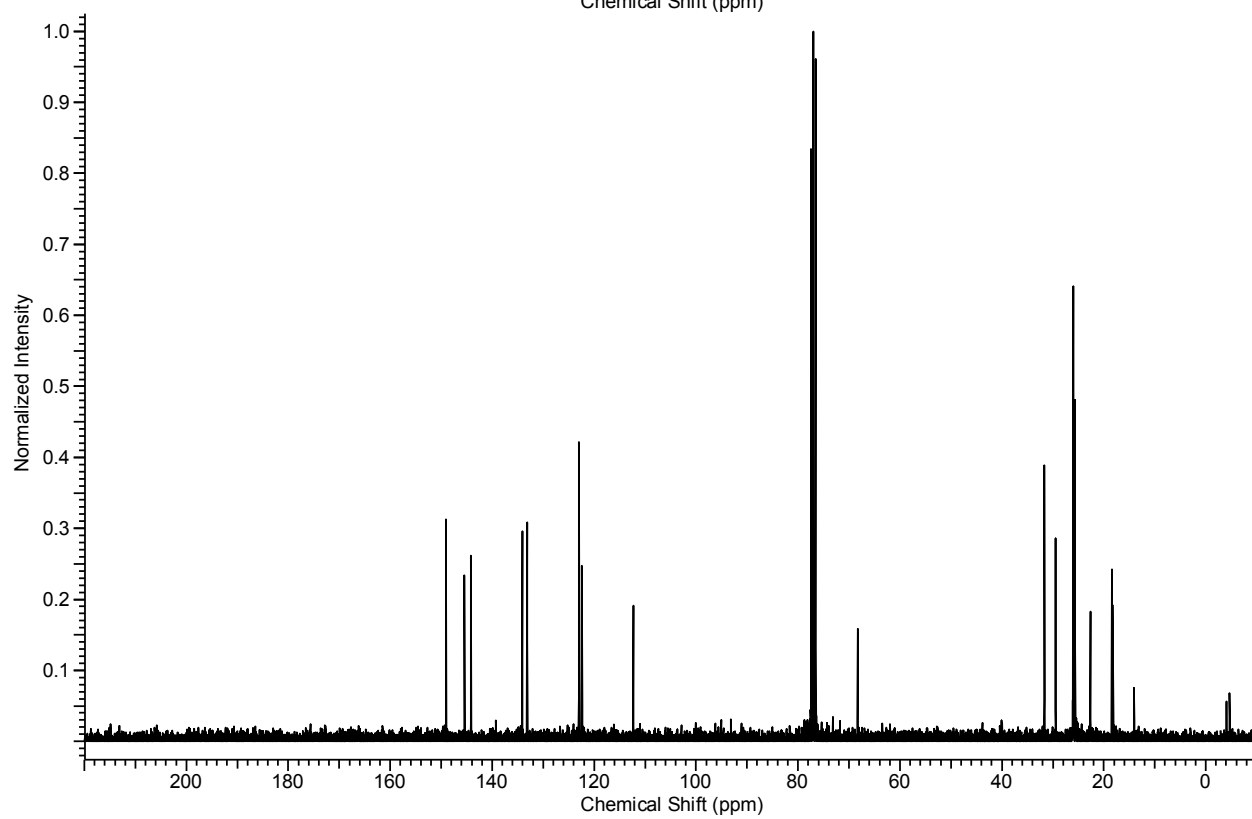

# Compound 23

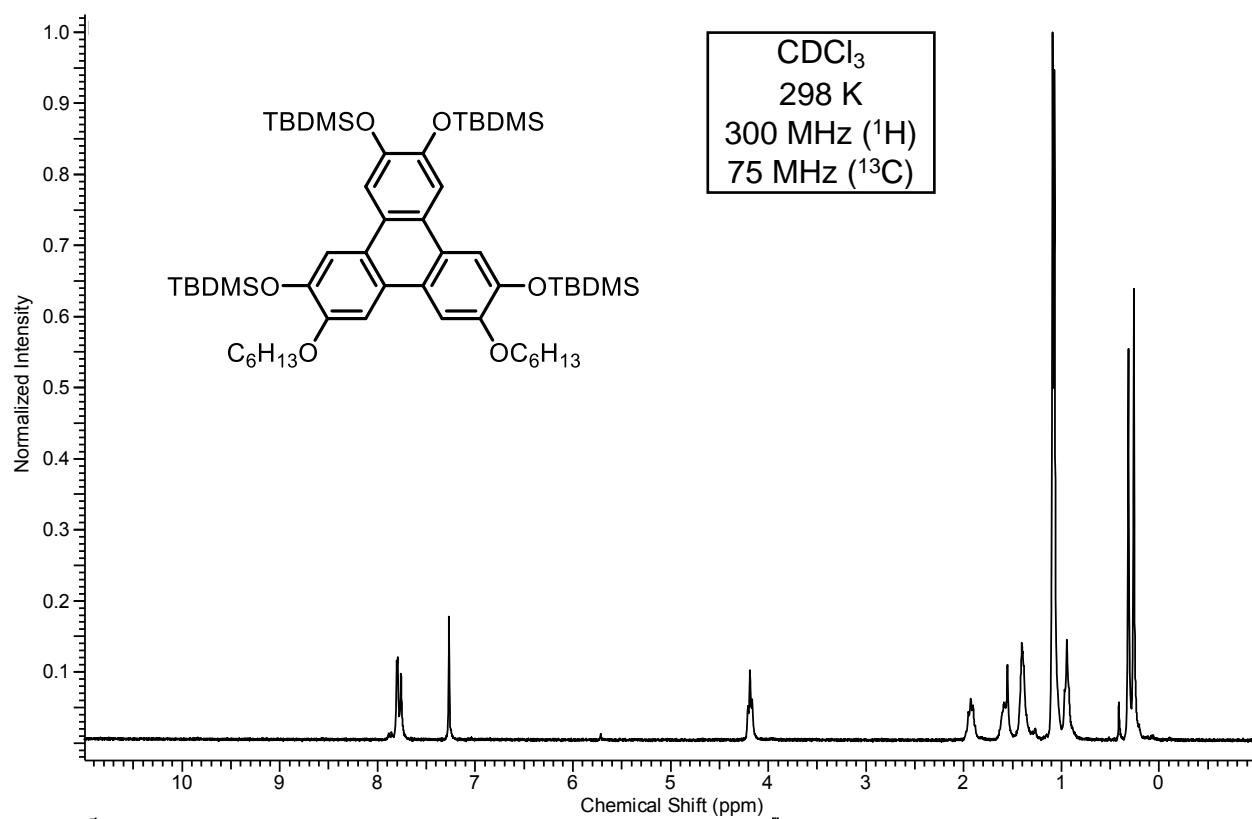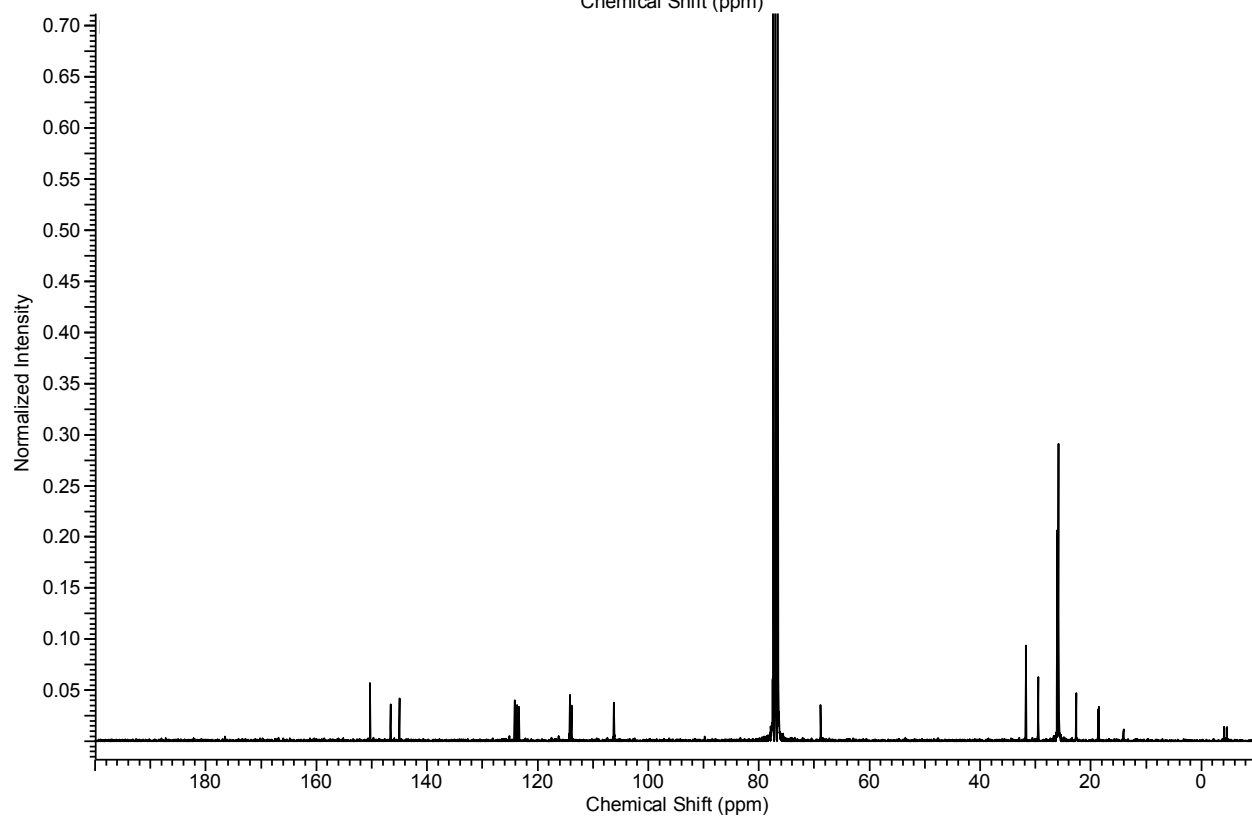

### Compound 26

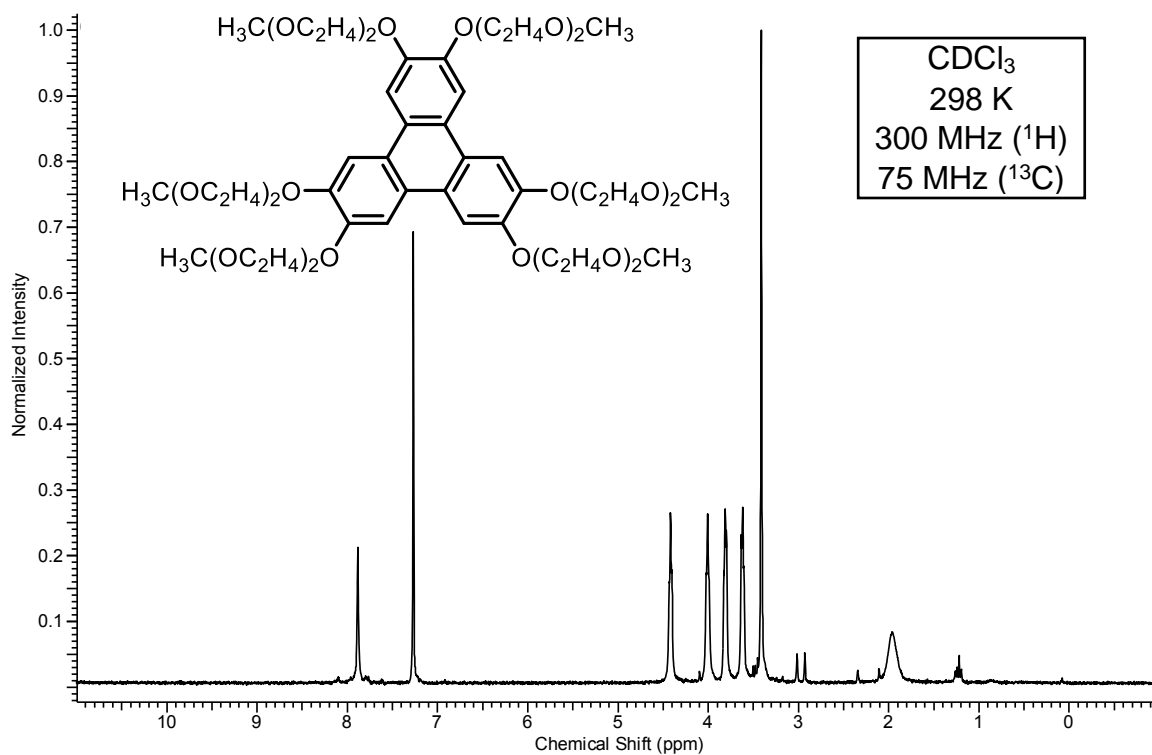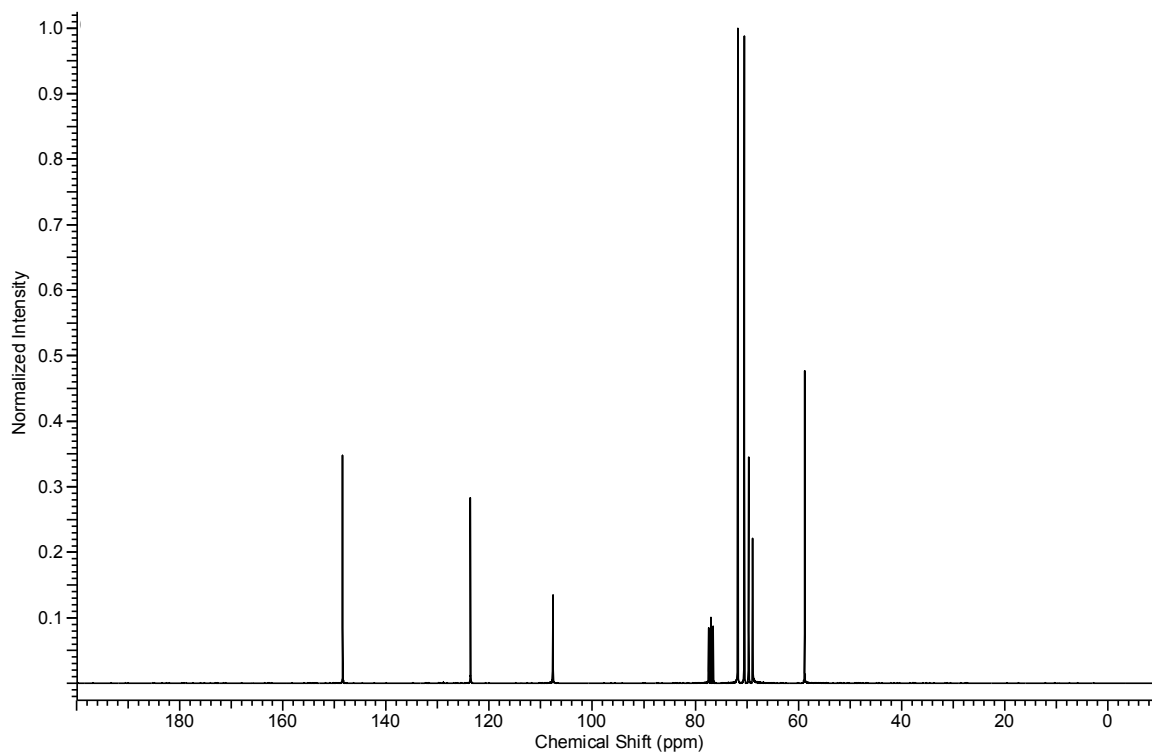

## DEPTs

### Compound 1 (processed CH up)

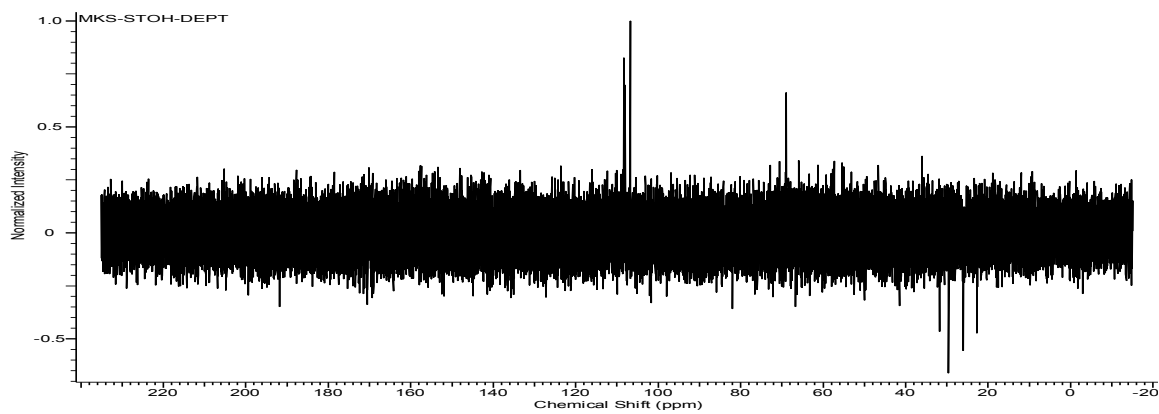

### Compound 2 (processed CH down)

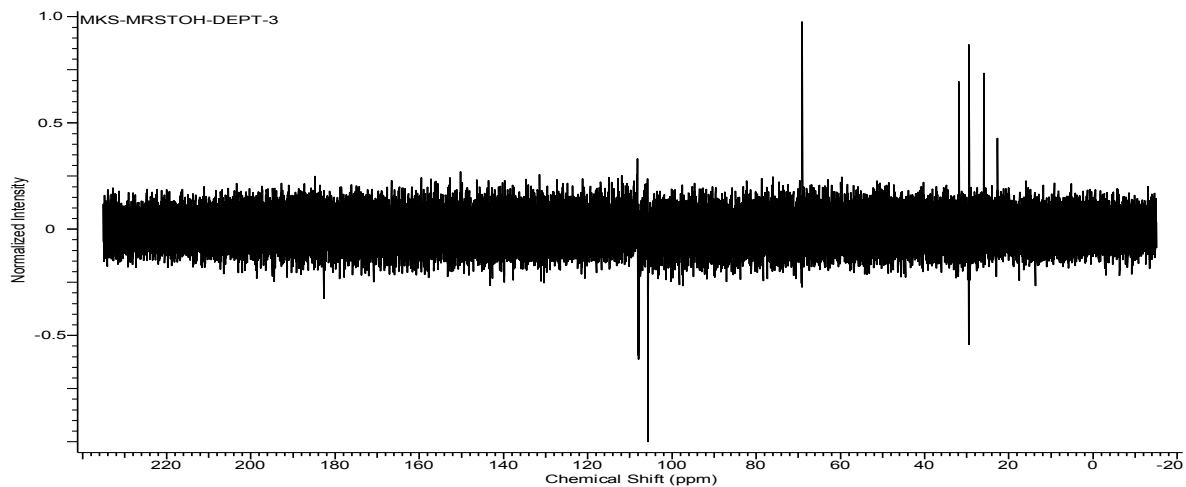

### Compound 3 (processed CH down)

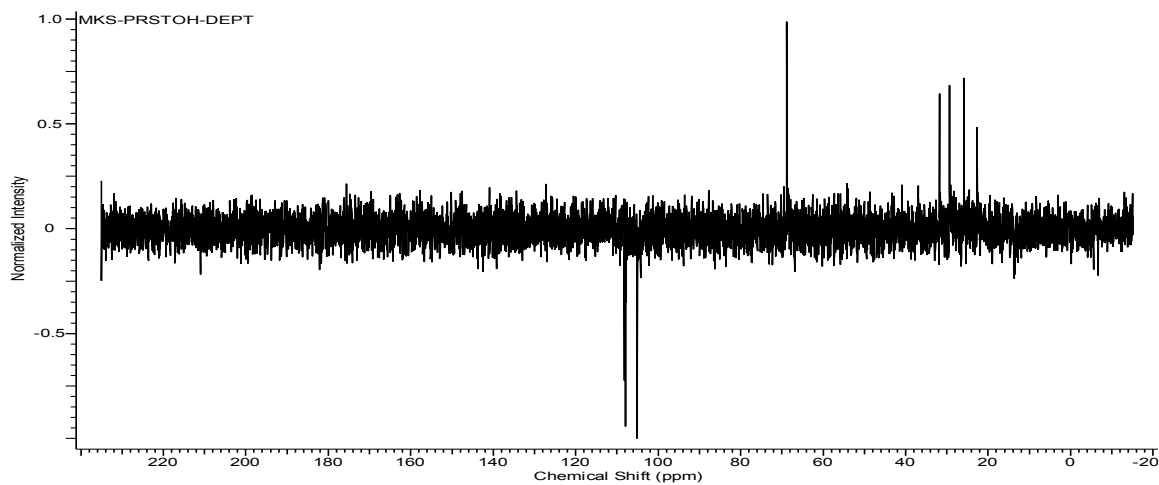



## IV. Mass Spectrometric Data

### Compound 1.

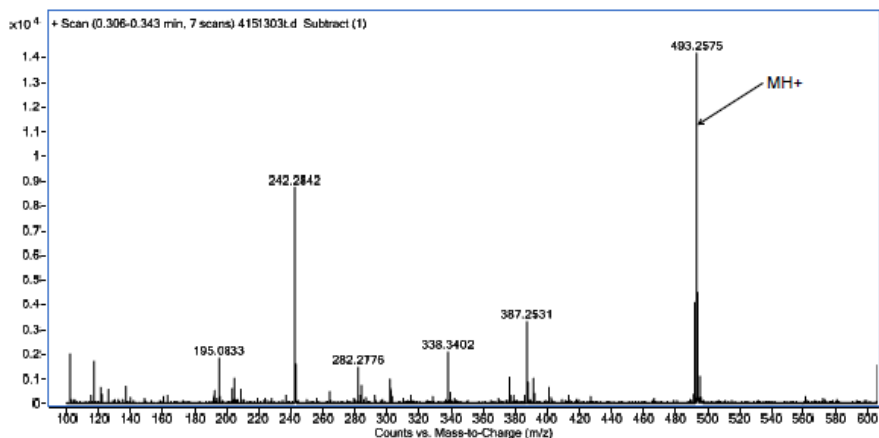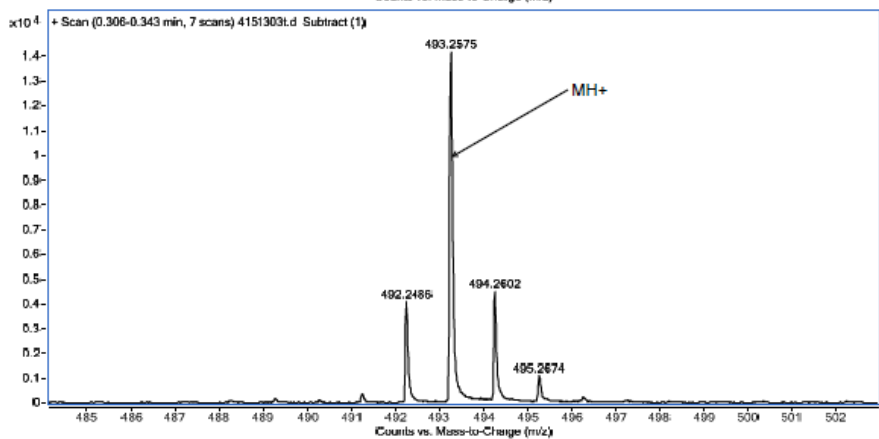

Measured Mass

493.2575

| Element | Low Limit | High Limit |
|---------|-----------|------------|
| C       | 25        | 35         |
| H       | 25        | 45         |
| O       | 4         | 8          |

| Formula                                        | Calculated Mass | mDaError | ppmError | RDB  |
|------------------------------------------------|-----------------|----------|----------|------|
| C <sub>30</sub> H <sub>37</sub> O <sub>6</sub> | 493.2585        | -1.0     | -2.0     | 12.5 |

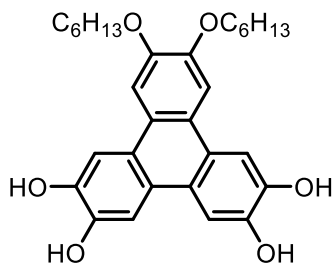

## Compound 2

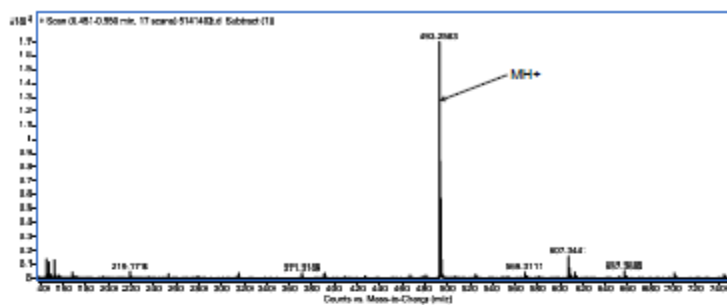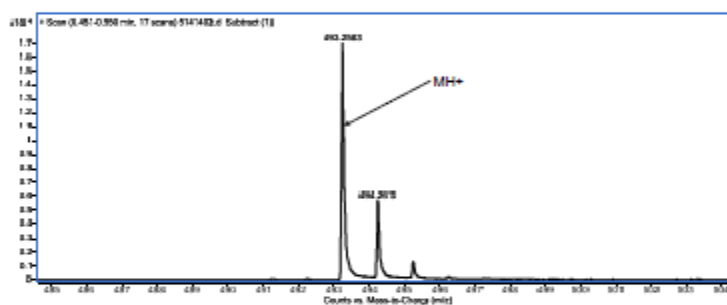

| Measured Mass |           | 493.2583   |  |  |  |
|---------------|-----------|------------|--|--|--|
| Element       | Low Limit | High Limit |  |  |  |
| C             | 25        | 35         |  |  |  |
| H             | 25        | 45         |  |  |  |
| O             | 4         | 8          |  |  |  |
| Na            | 0         | 1          |  |  |  |

  

| Formula                                           | Calculated Mass | mDaError | ppmError | RDB  |
|---------------------------------------------------|-----------------|----------|----------|------|
| C <sub>30</sub> H <sub>37</sub> O <sub>6</sub>    | 493.2585        | -0.2     | -0.3     | 12.5 |
| C <sub>28</sub> H <sub>38</sub> O <sub>6</sub> Na | 493.2561        | 2.2      | 4.5      | 9.5  |

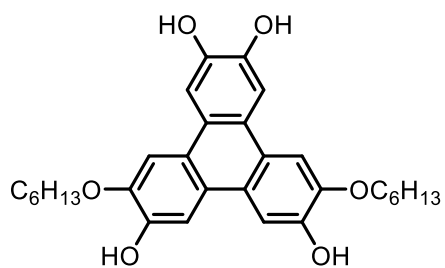

# Compound 3

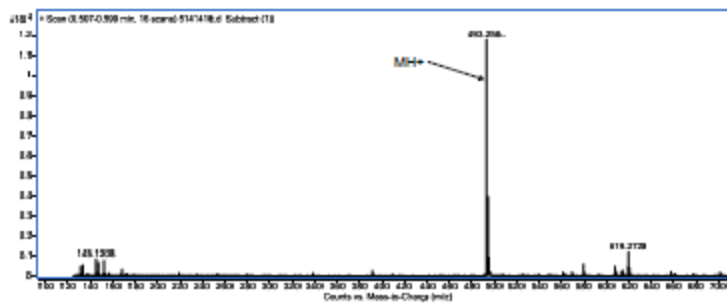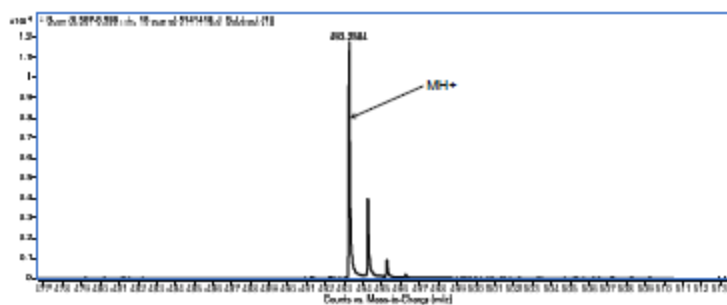

| Measured Mass  |                        | 493.2584        |                 |            |  |
|----------------|------------------------|-----------------|-----------------|------------|--|
| Element        | Low Limit              | High Limit      |                 |            |  |
| C              | 25                     | 35              |                 |            |  |
| H              | 25                     | 45              |                 |            |  |
| O              | 4                      | 8               |                 |            |  |
| <u>Formula</u> | <u>Calculated Mass</u> | <u>mDaError</u> | <u>ppmError</u> | <u>RDB</u> |  |
| C30 H37 O6     | 493.2585               | -0.1            | -0.1            | 12.5       |  |

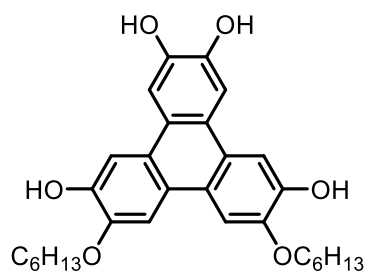

# Compound 4

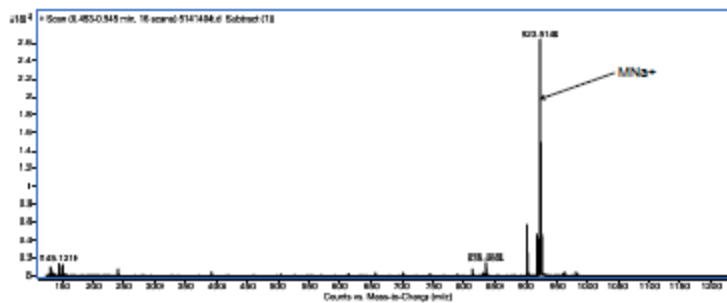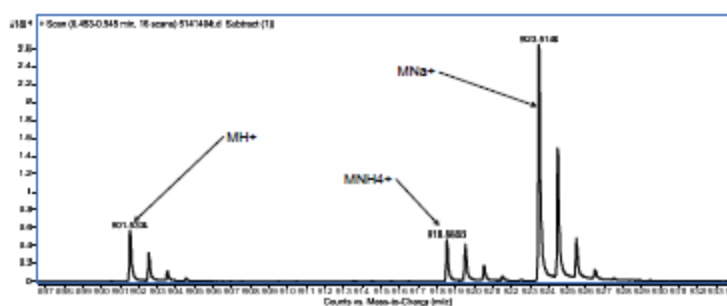

| Measured Mass |           | 923.5148   |  |  |  |
|---------------|-----------|------------|--|--|--|
| Element       | Low Limit | High Limit |  |  |  |
| C             | 46        | 56         |  |  |  |
| H             | 70        | 95         |  |  |  |
| O             | 5         | 15         |  |  |  |
| Na            | 0         | 1          |  |  |  |

  

| Formula        | Calculated Mass | mDaError | ppmError | RDB  |
|----------------|-----------------|----------|----------|------|
| C52 H75 O14    | 923.5151        | -0.3     | -0.4     | 15.5 |
| C50 H76 O14 Na | 923.5127        | 2.1      | 2.2      | 12.5 |

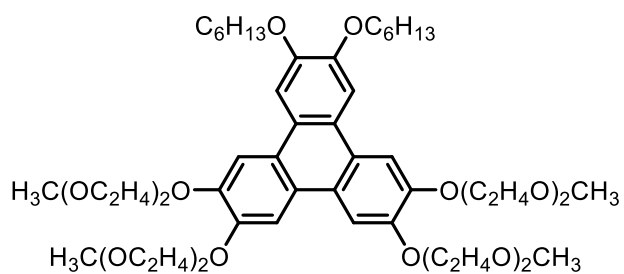

# Compound 5

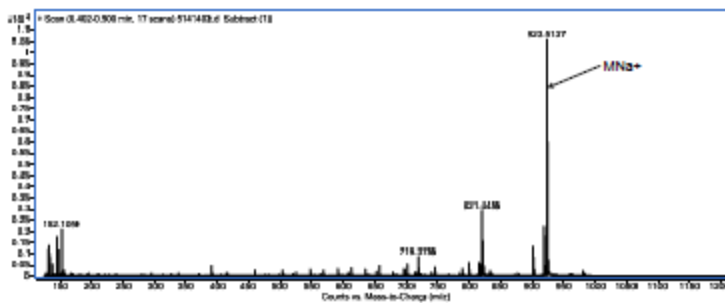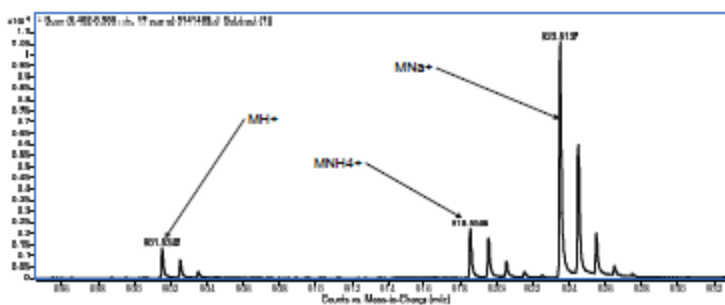

| Measured Mass |           | 923.5137   |  |  |  |
|---------------|-----------|------------|--|--|--|
| Element       | Low Limit | High Limit |  |  |  |
| C             | 46        | 56         |  |  |  |
| H             | 70        | 95         |  |  |  |
| O             | 5         | 15         |  |  |  |
| Na            | 0         | 1          |  |  |  |

  

| Formula        | Calculated Mass | mDaError | ppmError | RDB  |
|----------------|-----------------|----------|----------|------|
| C50 H76 O14 Na | 923.5127        | 1.0      | 1.1      | 12.5 |
| C52 H75 O14    | 923.5151        | -1.4     | -1.6     | 15.5 |

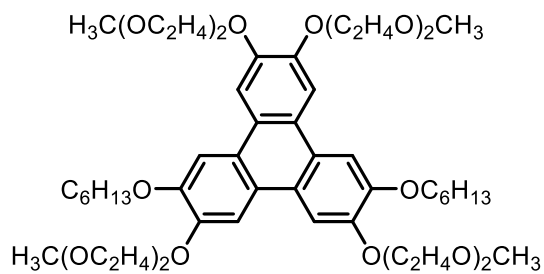

# Compound 6

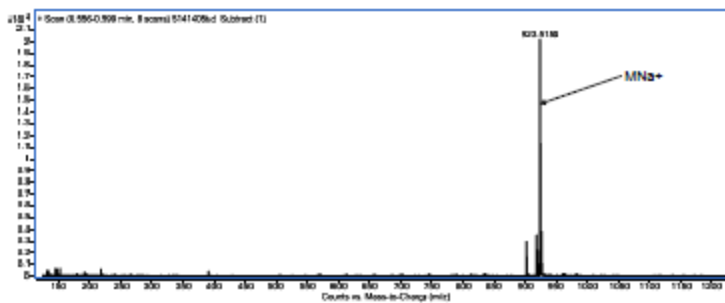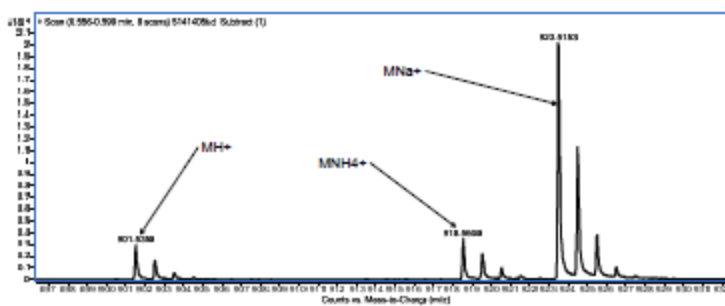

| Measured Mass |           | 923.5153   |  |  |
|---------------|-----------|------------|--|--|
| Element       | Low Limit | High Limit |  |  |
| C             | 46        | 56         |  |  |
| H             | 70        | 95         |  |  |
| O             | 5         | 15         |  |  |
| Na            | 0         | 1          |  |  |

  

| Formula        | Calculated Mass | mDaError | ppmError | RDB  |
|----------------|-----------------|----------|----------|------|
| C52 H75 O14    | 923.5151        | 0.2      | 0.2      | 15.5 |
| C50 H76 O14 Na | 923.5127        | 2.6      | 2.8      | 12.5 |

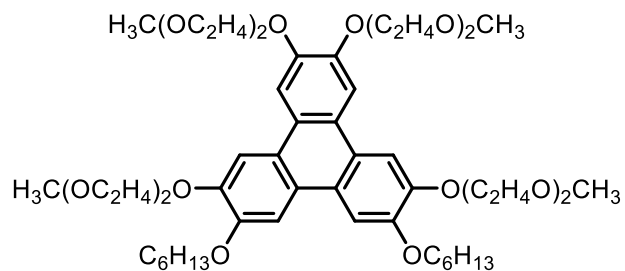

# Compound 9

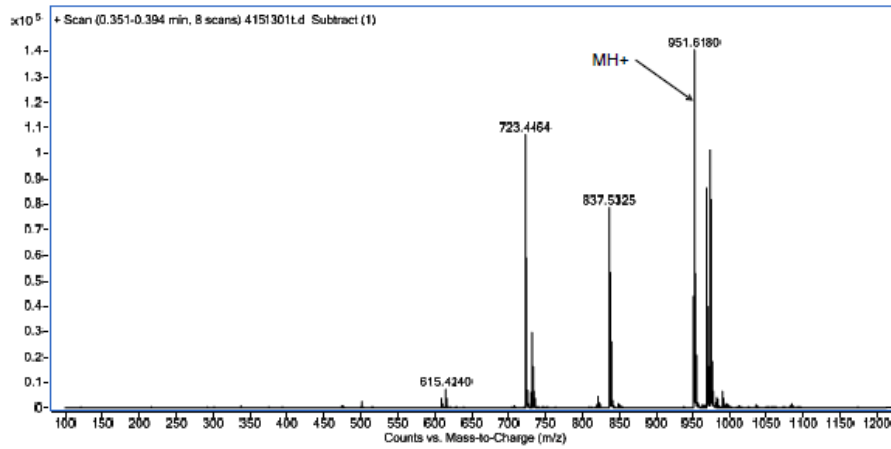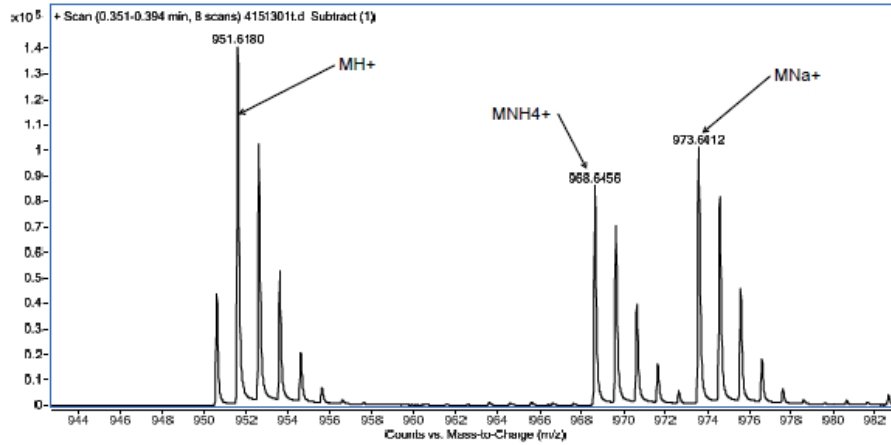

Measured Mass 951.618

| Element | Low Limit | High Limit |
|---------|-----------|------------|
| C       | 49        | 59         |
| H       | 85        | 105        |
| O       | 4         | 8          |
| Si      | 3         | 5          |

| Formula                                                        | Calculated Mass | mDaError | ppmError | RDB  |
|----------------------------------------------------------------|-----------------|----------|----------|------|
| C <sub>58</sub> H <sub>91</sub> O <sub>5</sub> Si <sub>3</sub> | 951.6169        | 1.1      | 1.2      | 16.5 |
| C <sub>54</sub> H <sub>95</sub> O <sub>6</sub> Si <sub>4</sub> | 951.6200        | -2.0     | -2.1     | 11.5 |

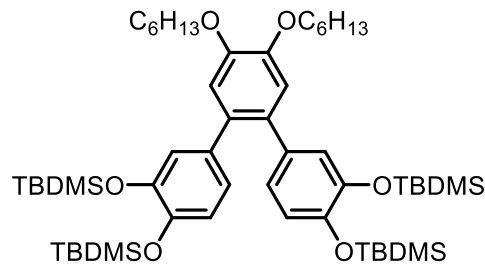

# Compound 10

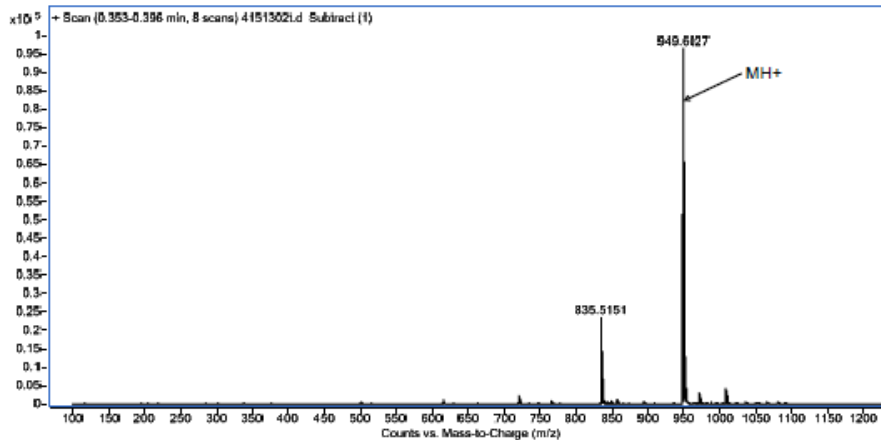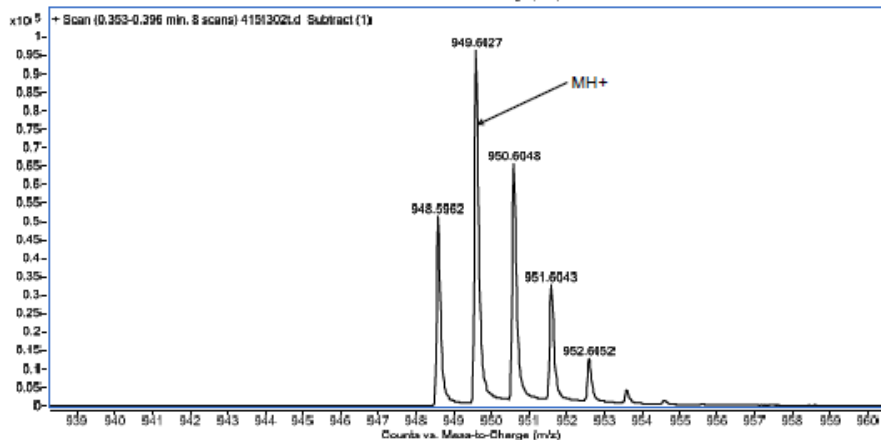

**Measured Mass**

949.6027

| Element | Low Limit | High Limit |
|---------|-----------|------------|
| C       | 49        | 59         |
| H       | 85        | 105        |
| O       | 4         | 8          |
| Si      | 3         | 5          |

| Formula                                                        | Calculated Mass | mDaError | ppmError | RDB  |
|----------------------------------------------------------------|-----------------|----------|----------|------|
| C <sub>58</sub> H <sub>89</sub> O <sub>5</sub> Si <sub>3</sub> | 949.6012        | 1.5      | 1.5      | 17.5 |
| C <sub>54</sub> H <sub>93</sub> O <sub>6</sub> Si <sub>4</sub> | 949.6044        | -1.7     | -1.8     | 12.5 |

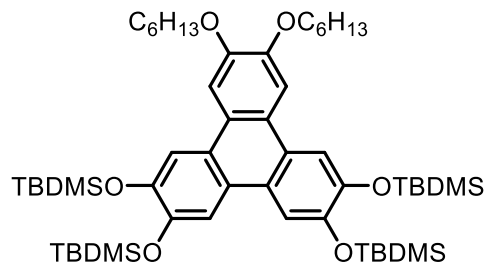



# Compound 13

Northrup(Wesleyan) MR1  
 5151401g 1169 (23.554) AM (Cen.1. 80.00. HL5100.0.413.98.1.00): 9m (80. 2x3.00): Cm (1167:1177) TOF MS EI+ 316

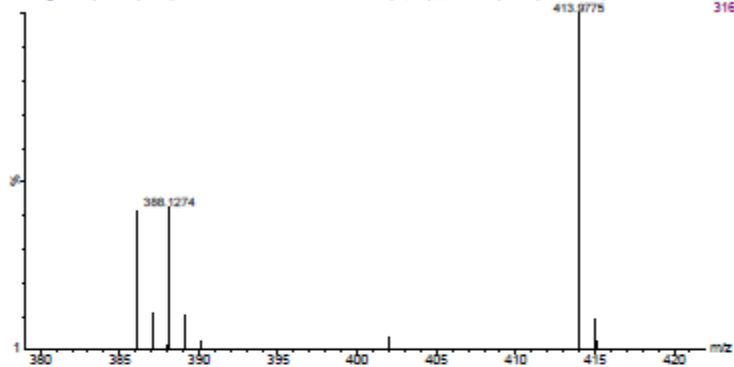

Measured Mass 386.1282

| Element | Low Limit | High Limit |
|---------|-----------|------------|
| C       | 2         | 60         |
| H       | 0         | 90         |
| N       | 0         | 2          |
| O       | 0         | 4          |
| Br      | 0         | 1          |
| Si      | 0         | 1          |

| Formula             | Calculated Mass | mDaError | ppmError | RDB |
|---------------------|-----------------|----------|----------|-----|
| C18 H31 O2 Si Br    | 386.1271        | 1.1      | 2.8      | 4   |
| C28 H18 O2          | 386.1301        | -1.9     | -5.0     | 20  |
| C23 H18 N2 O4       | 386.1261        | 2.1      | 5.4      | 16  |
| C22 H27 O Br        | 386.1240        | 4.2      | 10.9     | 9   |
| C18 H29 N O3 Br     | 386.1325        | -4.3     | -11.2    | 4.5 |
| C26 H18 N2 Si       | 386.1234        | 4.8      | 12.5     | 20  |
| C24 H22 O3 Si       | 386.1333        | -5.1     | -13.1    | 15  |
| C13 H31 N2 O4 Si Br | 386.1231        | 5.1      | 13.2     | 0   |

Accurate mass done by EI/GCMS for same reasons as sample PR3  
 again see expected M+

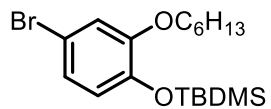

# Compound 14

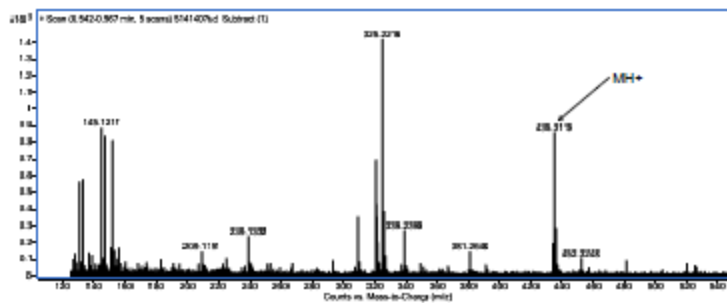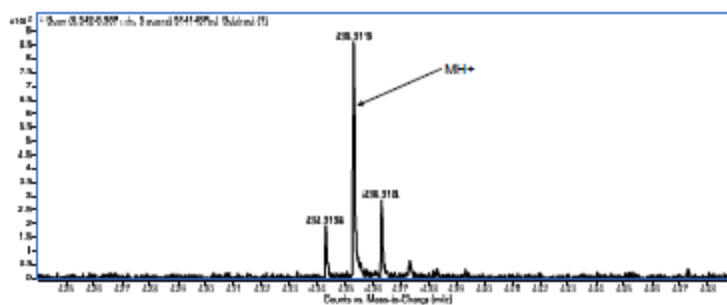

| Measured Mass |           | 435.311    |  |  |  |
|---------------|-----------|------------|--|--|--|
| Element       | Low Limit | High Limit |  |  |  |
| C             | 19        | 29         |  |  |  |
| H             | 35        | 55         |  |  |  |
| O             | 2         | 6          |  |  |  |
| 11B           | 0         | 1          |  |  |  |
| Si            | 0         | 1          |  |  |  |

  

| Formula           | Calculated Mass | mDaError | ppmError | RDB |
|-------------------|-----------------|----------|----------|-----|
| C26 H43 O5        | 435.3105        | 0.5      | 1.1      | 5.5 |
| C24 H44 11B O4 Si | 435.3096        | 1.4      | 3.1      | 4.5 |

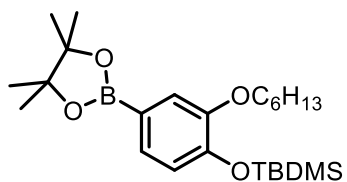

# Compound 16

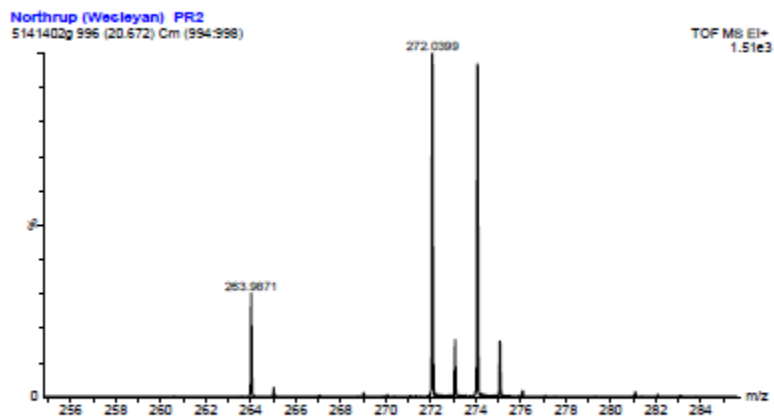

Measured Mass 272.0399

| Element | Low Limit | High Limit |
|---------|-----------|------------|
| C       | 2         | 60         |
| H       | 0         | 90         |
| N       | 0         | 6          |
| O       | 0         | 6          |
| Br      | 0         | 1          |

| Formula              | Calculated Mass | mDaError    | ppmError    | RDB      |
|----------------------|-----------------|-------------|-------------|----------|
| C10 H15 N3 O Br      | 272.0393        | 0.6         | 2.2         | 4.5      |
| <b>C12 H17 O2 Br</b> | <b>272.0406</b> | <b>-0.7</b> | <b>-2.7</b> | <b>4</b> |
| C11 H6 N5 O4         | 272.0414        | -1.5        | -5.6        | 11.5     |
| C8 H13 N6 Br         | 272.0380        | 1.9         | 7.1         | 5        |
| C13 H8 N2 O5         | 272.0428        | -2.9        | -10.6       | 11       |
| C20 H4 N2            | 272.0369        | 3.0         | 11.0        | 20       |
| C7 H17 N2 O4 Br      | 272.0366        | 3.3         | 12.1        | 0        |

Accurate mass done via EI/GCMS and shows expected M+

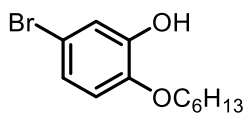

# Compound 17

Northrup (Wesleyan) PR3  
 5141403g 1167 (23.517) AM (Cen.1. 80.00. Ht.6100.0.413.98.1.00): 6m (90. 2x3.00): Cm (1165:1169) TOF MS ESI-  
 155

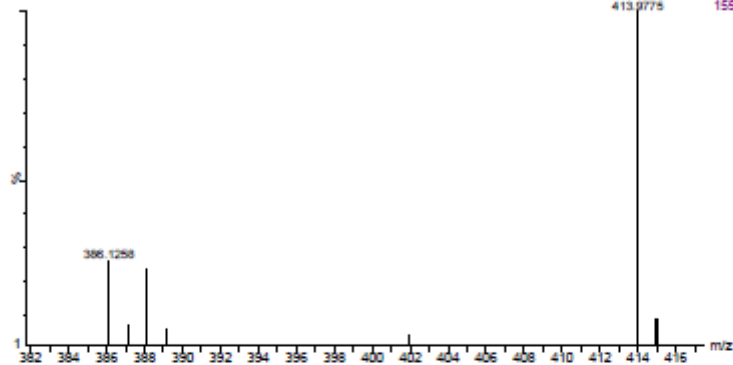

Measured Mass 386.1258

| Element | Low Limit | High Limit |
|---------|-----------|------------|
| C       | 2         | 60         |
| H       | 0         | 90         |
| N       | 0         | 2          |
| O       | 0         | 4          |
| Br      | 0         | 1          |
| Si      | 0         | 1          |

| Formula             | Calculated Mass | mDaError | ppmError | RDB  |
|---------------------|-----------------|----------|----------|------|
| C23 H18 N2 O4       | 386.1261        | -0.3     | -0.8     | 16   |
| C18 H31 O2 Si Br    | 386.1271        | -1.3     | -3.4     | 4    |
| C22 H27 O Br        | 386.1240        | 1.8      | 4.7      | 9    |
| C26 H18 N2 Si       | 386.1234        | 2.4      | 6.3      | 20   |
| C13 H31 N2 O4 Si Br | 386.1231        | 2.7      | 7.0      | 0    |
| C28 H18 O2          | 386.1301        | -4.3     | -11.2    | 20   |
| C23 H20 N O3 Si     | 386.1207        | 5.1      | 13.2     | 15.5 |

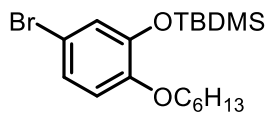

# Compound 18

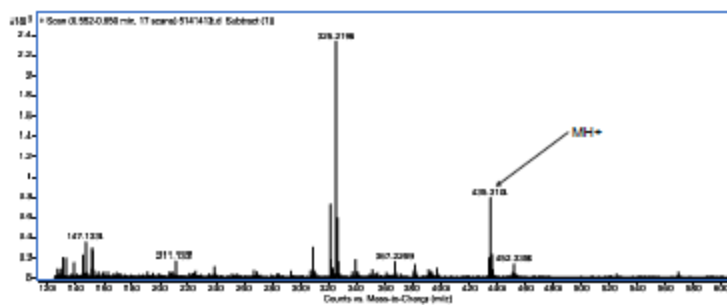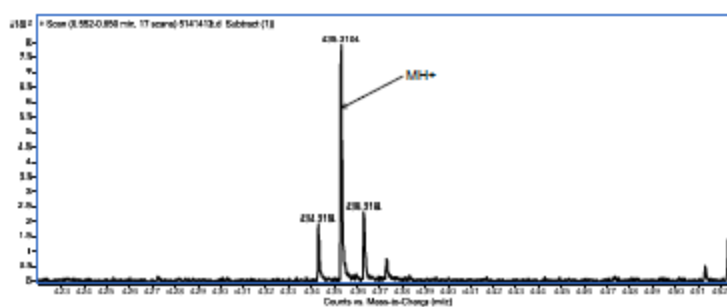

**Measured Mass**

435.3104

| Element | Low Limit | High Limit |
|---------|-----------|------------|
| C       | 19        | 29         |
| H       | 35        | 55         |
| O       | 2         | 6          |
| 11B     | 0         | 1          |
| Si      | 0         | 1          |

| Formula           | Calculated Mass | mDaError | ppmError | RDB |
|-------------------|-----------------|----------|----------|-----|
| C26 H43 O5        | 435.3105        | -0.1     | -0.2     | 5.5 |
| C24 H44 11B O4 Si | 435.3096        | 0.8      | 1.7      | 4.5 |

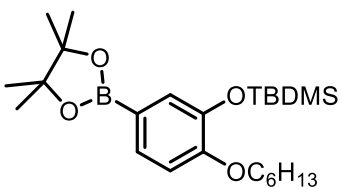

# Compound 20

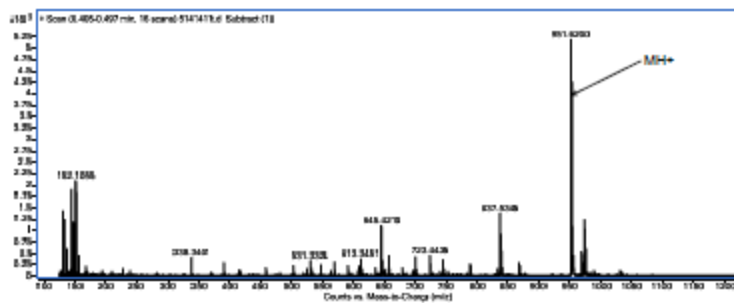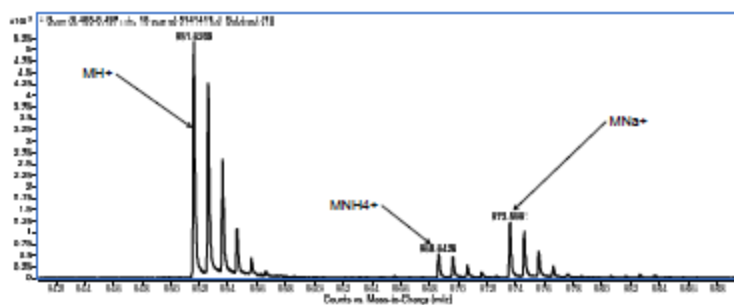

| Measured Mass |           | 951.62     |  |  |  |
|---------------|-----------|------------|--|--|--|
| Element       | Low Limit | High Limit |  |  |  |
| C             | 49        | 59         |  |  |  |
| H             | 65        | 105        |  |  |  |
| O             | 4         | 8          |  |  |  |
| Si            | 3         | 5          |  |  |  |

  

| Formula        | Calculated Mass | mDaError | ppmError | RDB  |
|----------------|-----------------|----------|----------|------|
| C54 H95 O6 Si4 | 951.6200        | 0.0      | 0.0      | 11.5 |
| C58 H91 O6 Si3 | 951.6169        | 3.1      | 3.3      | 16.5 |
| C50 H99 O7 Si5 | 951.6232        | -3.2     | -3.3     | 6.5  |

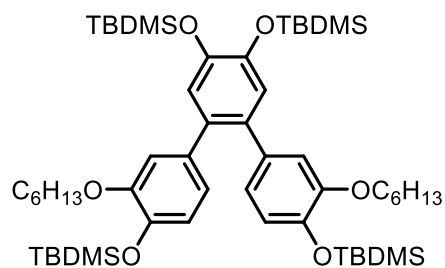

# Compound 21

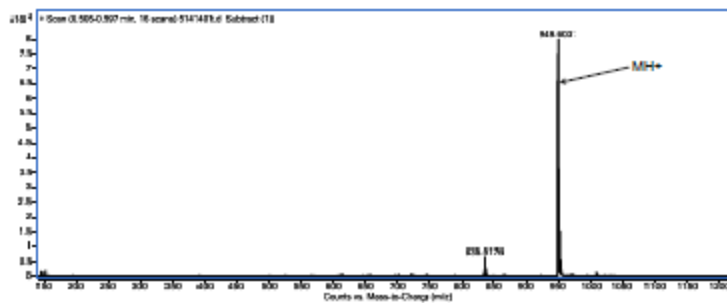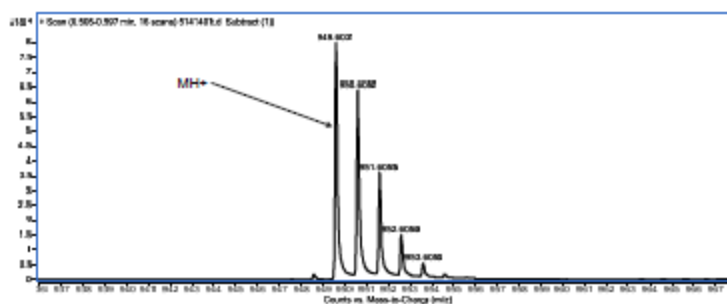

| Measured Mass |           | 949.6031   |  |  |  |
|---------------|-----------|------------|--|--|--|
| Element       | Low Limit | High Limit |  |  |  |
| C             | 46        | 56         |  |  |  |
| H             | 70        | 95         |  |  |  |
| O             | 5         | 15         |  |  |  |
| Si            | 2         | 6          |  |  |  |

  

| Formula         | Calculated Mass | mDaError | ppmError | RDB  |
|-----------------|-----------------|----------|----------|------|
| C55 H89 O9 Si2  | 949.6040        | -0.9     | -0.9     | 13.5 |
| C54 H93 O6 Si4  | 949.6044        | -1.3     | -1.3     | 12.5 |
| C51 H93 O10 Si3 | 949.6071        | -4.0     | -4.2     | 8.5  |

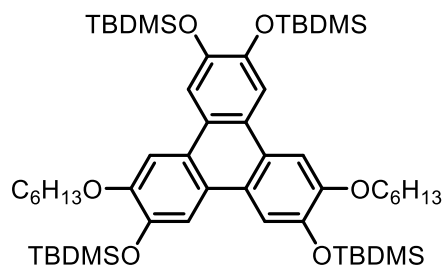

# Compound 22

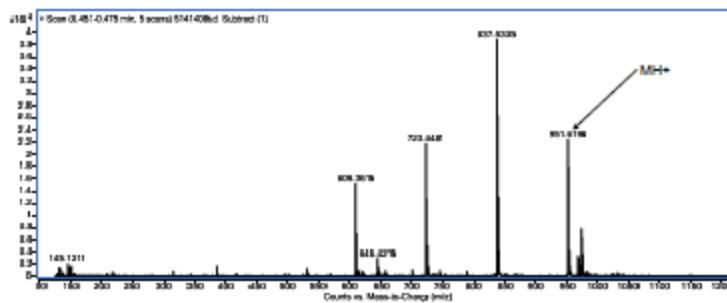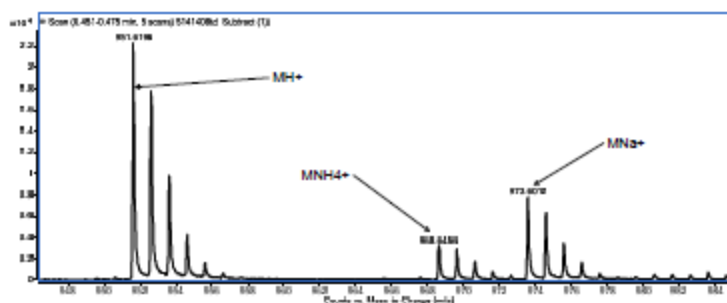

| Measured Mass |           | 951.6196   |  |  |  |
|---------------|-----------|------------|--|--|--|
| Element       | Low Limit | High Limit |  |  |  |
| C             | 49        | 59         |  |  |  |
| H             | 65        | 105        |  |  |  |
| O             | 4         | 8          |  |  |  |
| Si            | 3         | 5          |  |  |  |

  

| Formula        | Calculated Mass | mDaError | ppmError | RDB  |
|----------------|-----------------|----------|----------|------|
| C54 H95 O6 Si4 | 951.6200        | -0.4     | -0.5     | 11.5 |
| C58 H91 O6 Si3 | 951.6169        | 2.7      | 2.8      | 16.5 |
| C50 H99 O7 Si5 | 951.6232        | -3.6     | -3.8     | 6.5  |

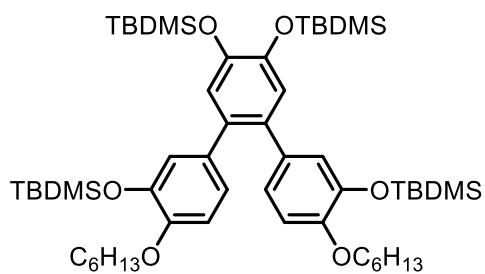



# Compound 23

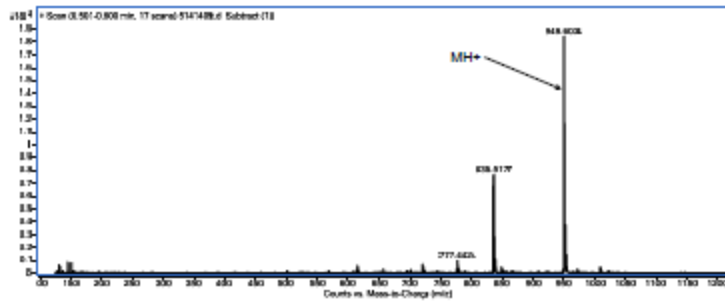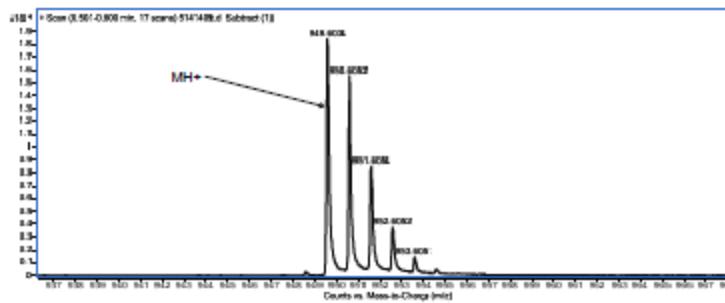

| Measured Mass |           | 949.6034   |  |  |  |
|---------------|-----------|------------|--|--|--|
| Element       | Low Limit | High Limit |  |  |  |
| C             | 49        | 59         |  |  |  |
| H             | 85        | 105        |  |  |  |
| O             | 4         | 8          |  |  |  |
| Si            | 3         | 5          |  |  |  |

  

| Formula        | Calculated Mass | mDaError | ppmError | RDB  |
|----------------|-----------------|----------|----------|------|
| C54 H93 O6 Si4 | 949.6044        | -1.0     | -1.0     | 12.5 |
| C58 H89 O6 Si3 | 949.6012        | 2.2      | 2.3      | 17.5 |
| C50 H97 O7 Si5 | 949.6075        | -4.1     | -4.3     | 7.5  |

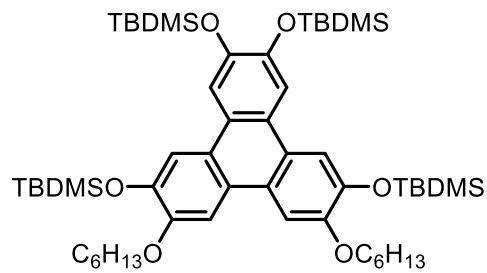



## V. UV/Vis & Fluorescence Spectroscopy

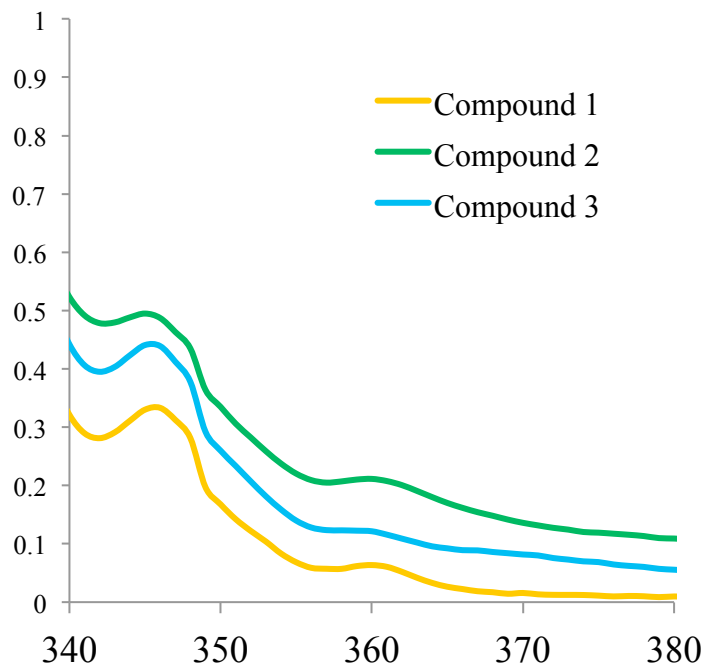

**Figure S1:** Overlaid UV/Vis spectra of triphenylene tetra-ols **1-3**. All spectra were collected in THF ( $1.0 \times 10^{-5}$  M) at 298 K.

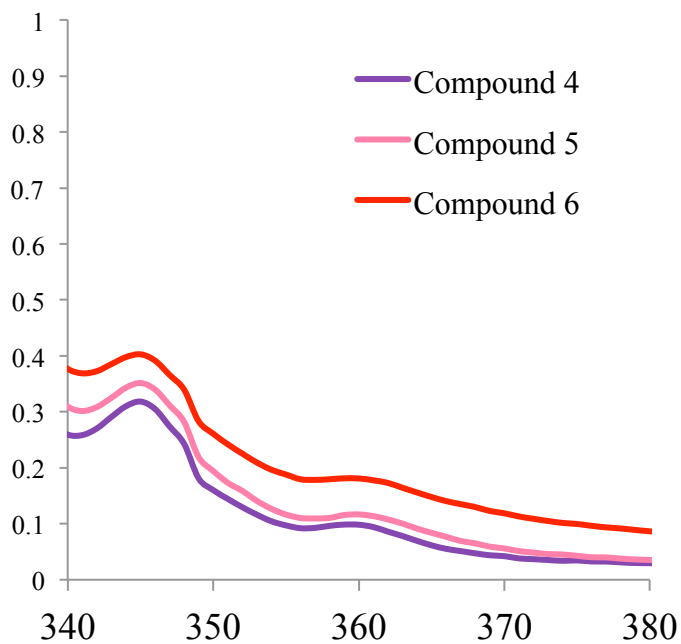

**Figure S2:** Overlaid UV/Vis spectra of amphiphilic triphenylenes **4-6**. All spectra were collected in THF ( $1.0 \times 10^{-5}$  M) at 298 K.

## VI. Differential Scanning Calorimetry

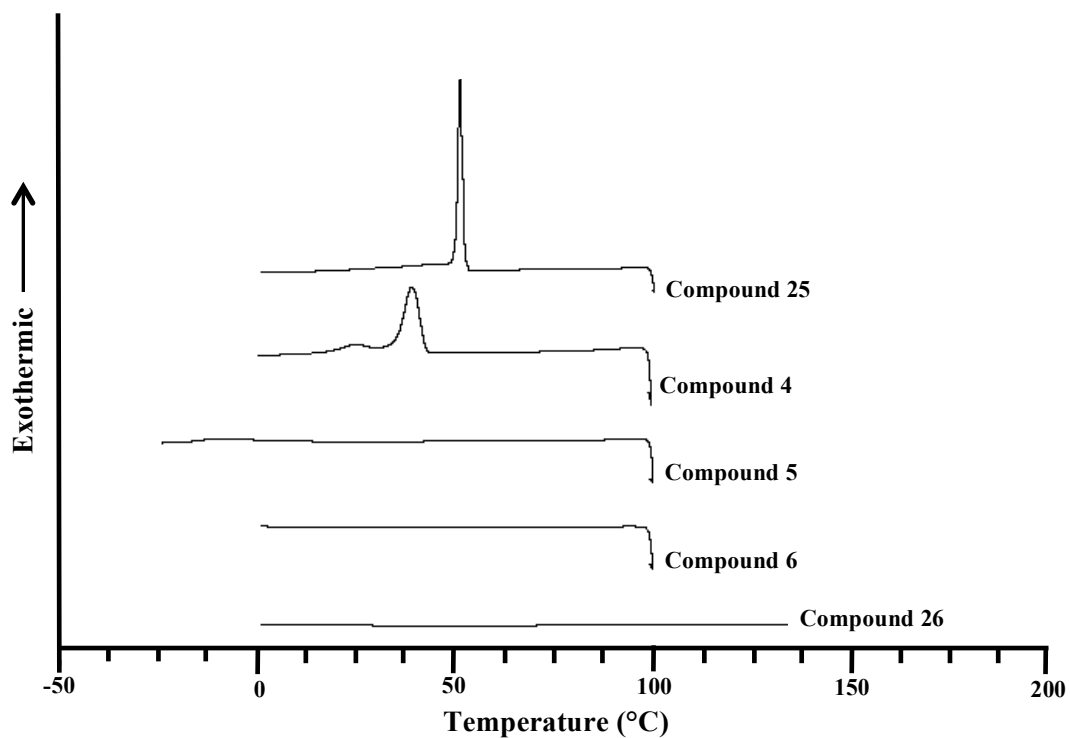

Figure S3. DSC cooling thermal diagram traces for **Compounds 4-6, 25, and 26** at 5°C/min.

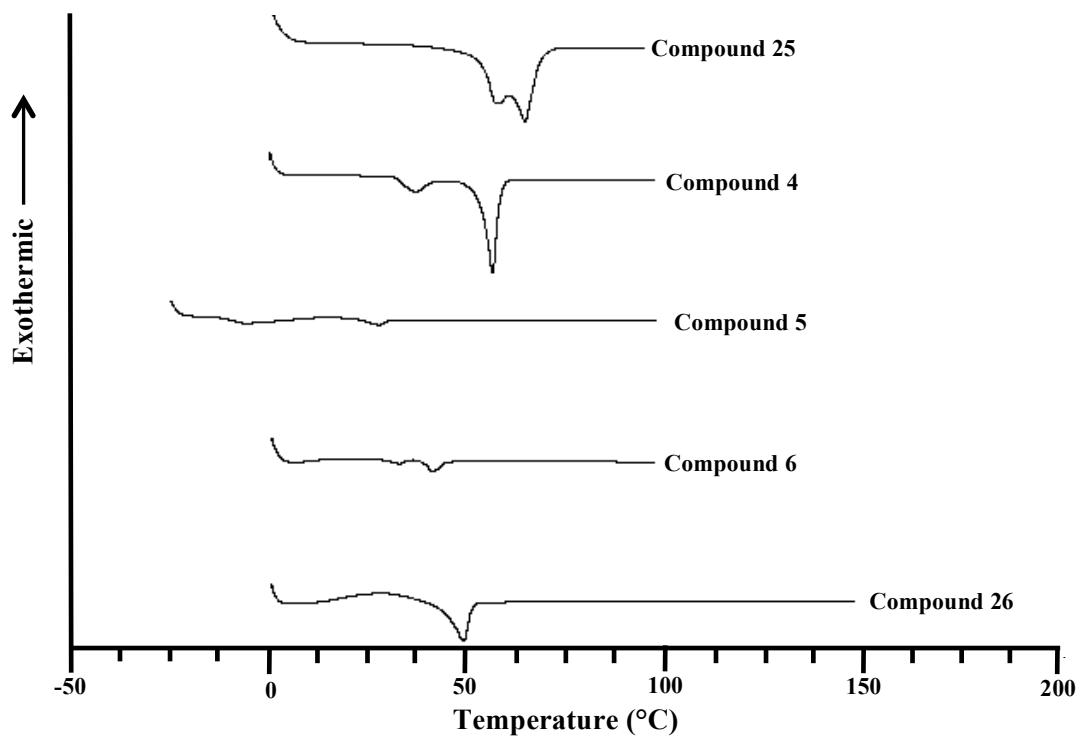

Figure S4. DSC second heating thermal diagram traces for **Compounds 4-6, 25, and 26** at 10°C/min.

## VII. Supporting References

- (1) T. Sauer and G. Wegner, *Mol. Cryst. Liq. Cryst.*, 1988, **162**, 97.
- (2) V. Bhalla, H. Singh and M. Kumar, *Org. Lett.*, 2010, **12**, 628.
- (3) N. Boden, R. J. Bushby and A. N. Cammidge, *J. Am. Chem. Soc.*, 2011, **21**, 1704.
- (4) E. Font-Sanchez, F. J. Cespedes-Guirao, A. Sastre-Santos, B. Villacampa, J. Orduna, R. Alicante and F. Fernandez-Lazaro, *Tetrahedron*, 2009, **65**, 4513
- (5) Q. Peng, H. Lu, Zhi-Yun, X. Yan, H. Ming-Gui, Shao-Hu, J-B. Peng and Y. Cao, *Macromolecules*, 2004, **37**, 260
- (6) S. Madan and C-H. Cheng, *J. Org. Chem.*, 2006, **71**, 8312.
- (7) *Handbook of Liquid Crystals – Low Molecular Weight Liquid Crystals, Vol. 2B*, ed. D. Demus, J. Goodby, G. W. Gray, H.-W. Spiess and V. Vill, Wiley VCH, Weinheim, 1998
